# Supplementary material
Source: PubMed Central journal article supplement (PMC6970930)
Supplement: supp_RA119.011443_156410_2_supp_442179_q2b6cn.pdf [file supp_RA119.011443_156410_2_supp_442179_q2b6cn.pdf]

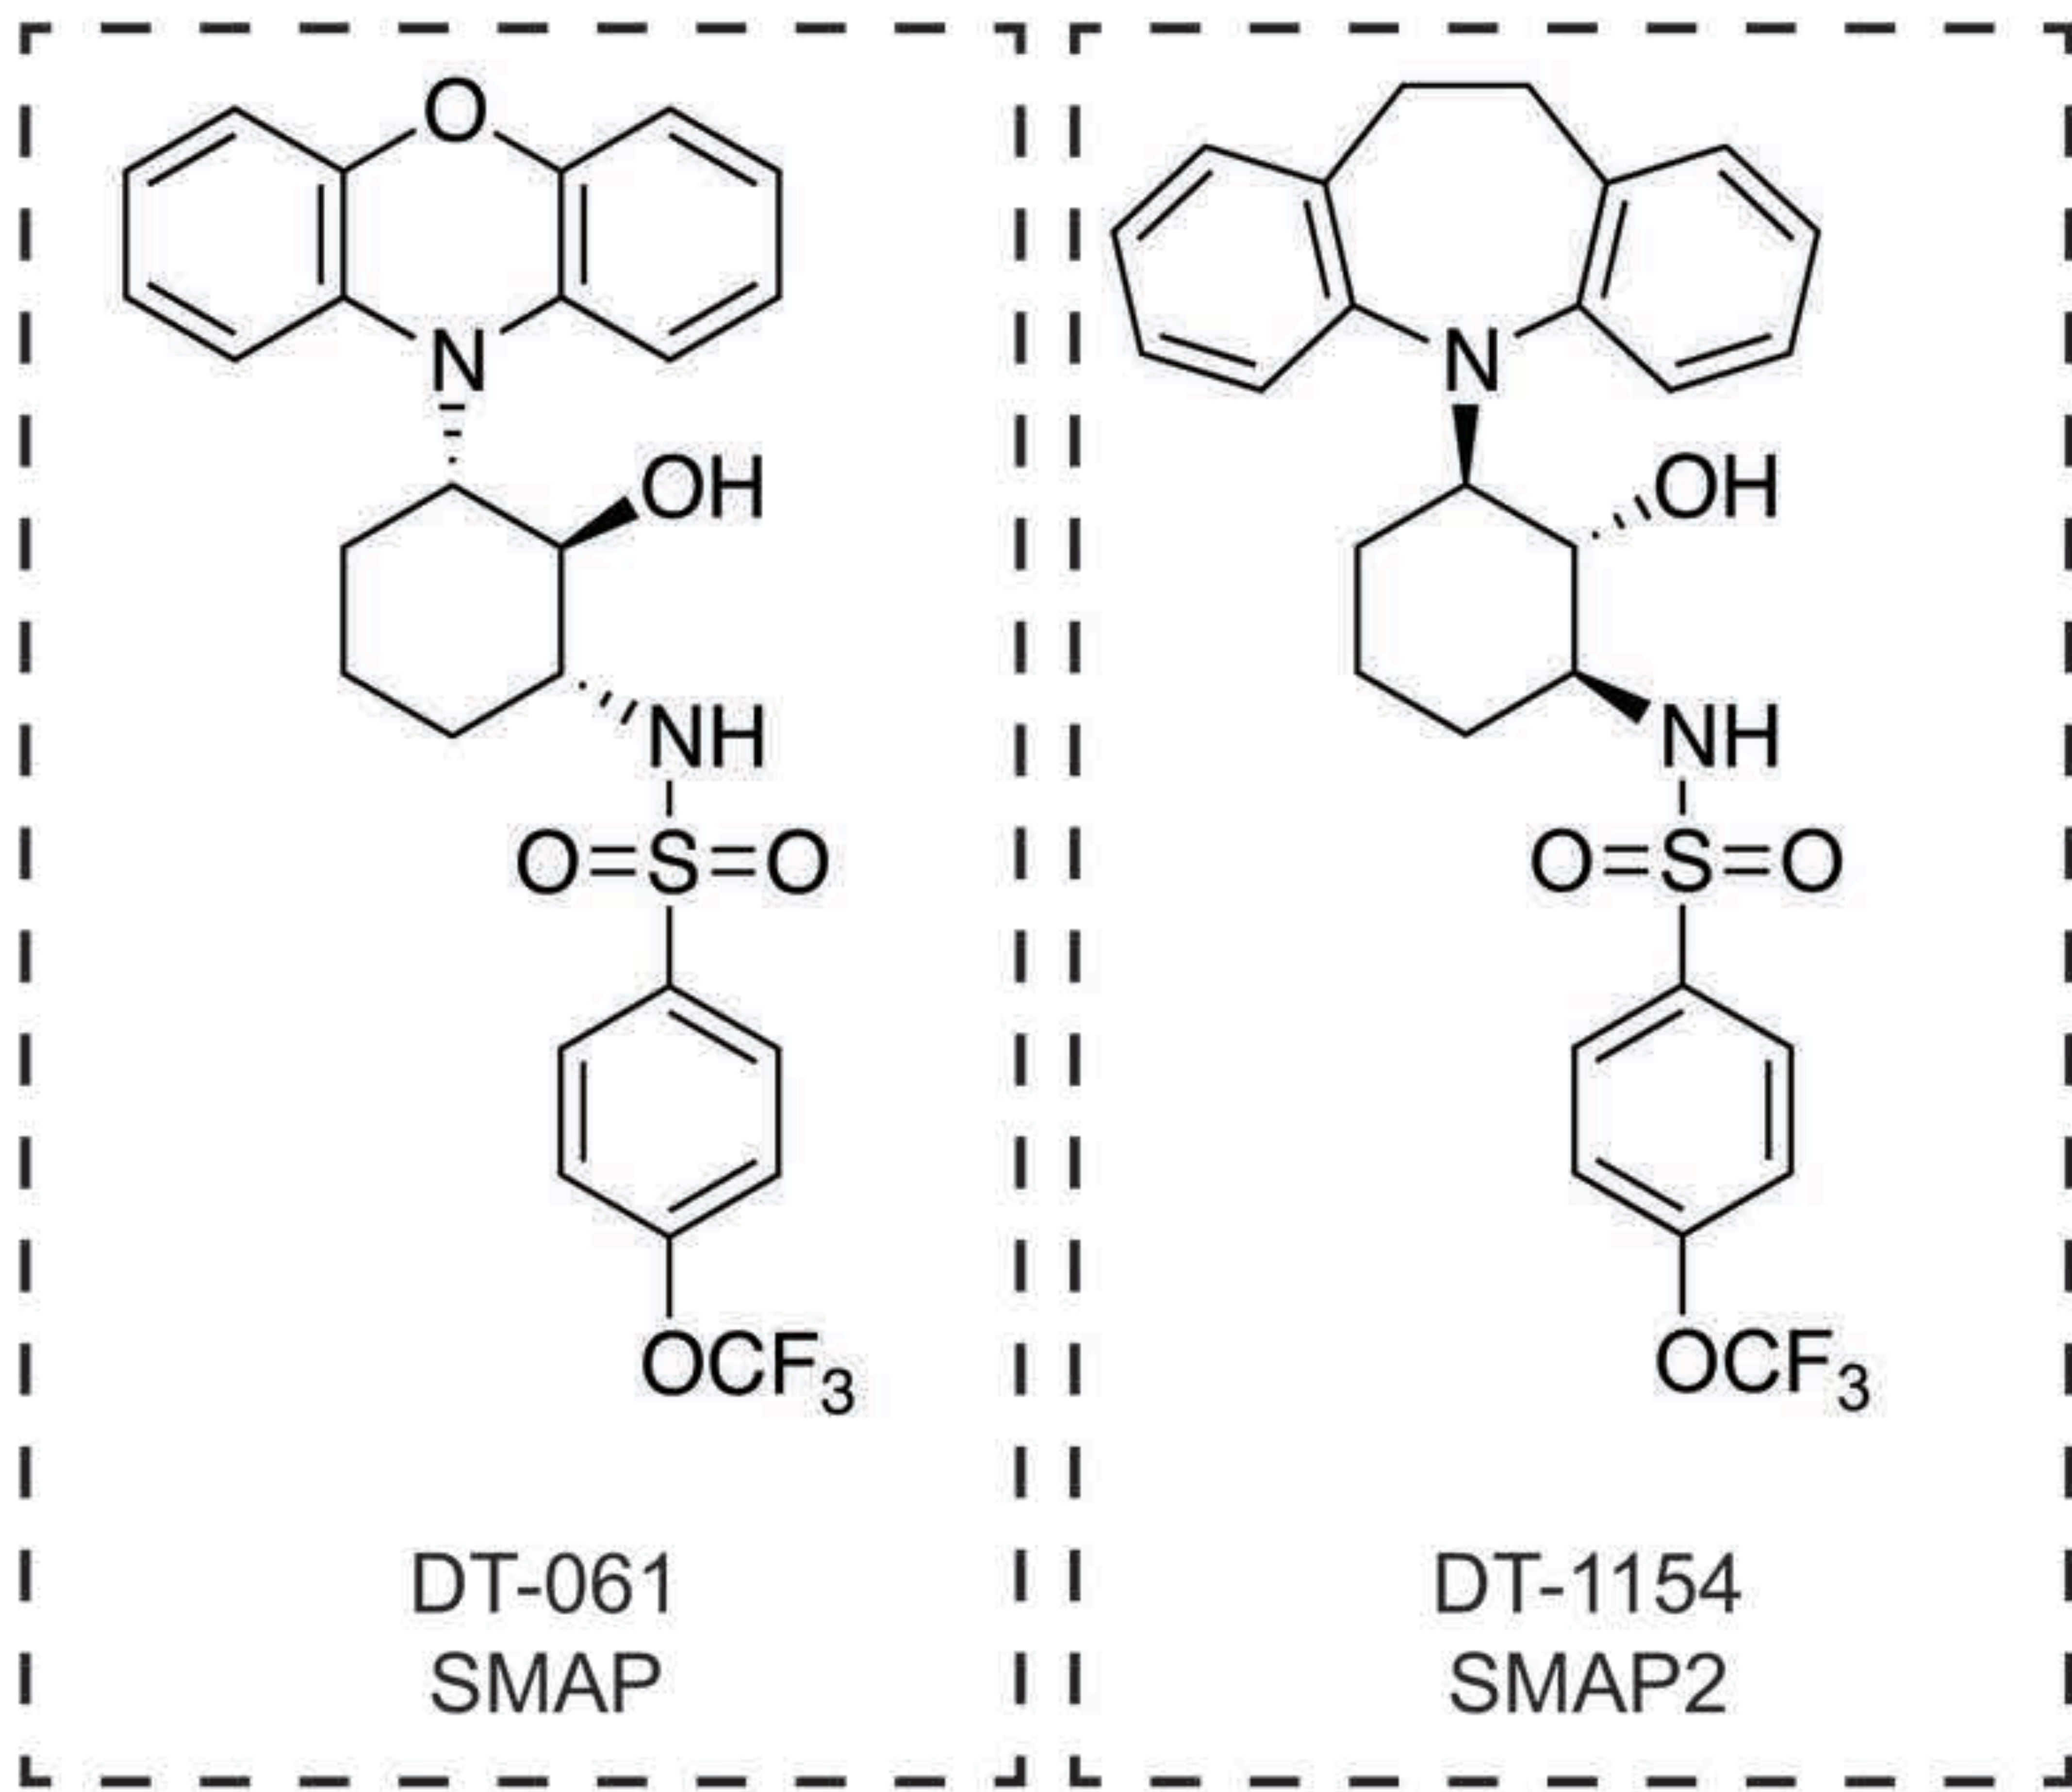

**Supplemental Figure 1.** Structure of SMAPs

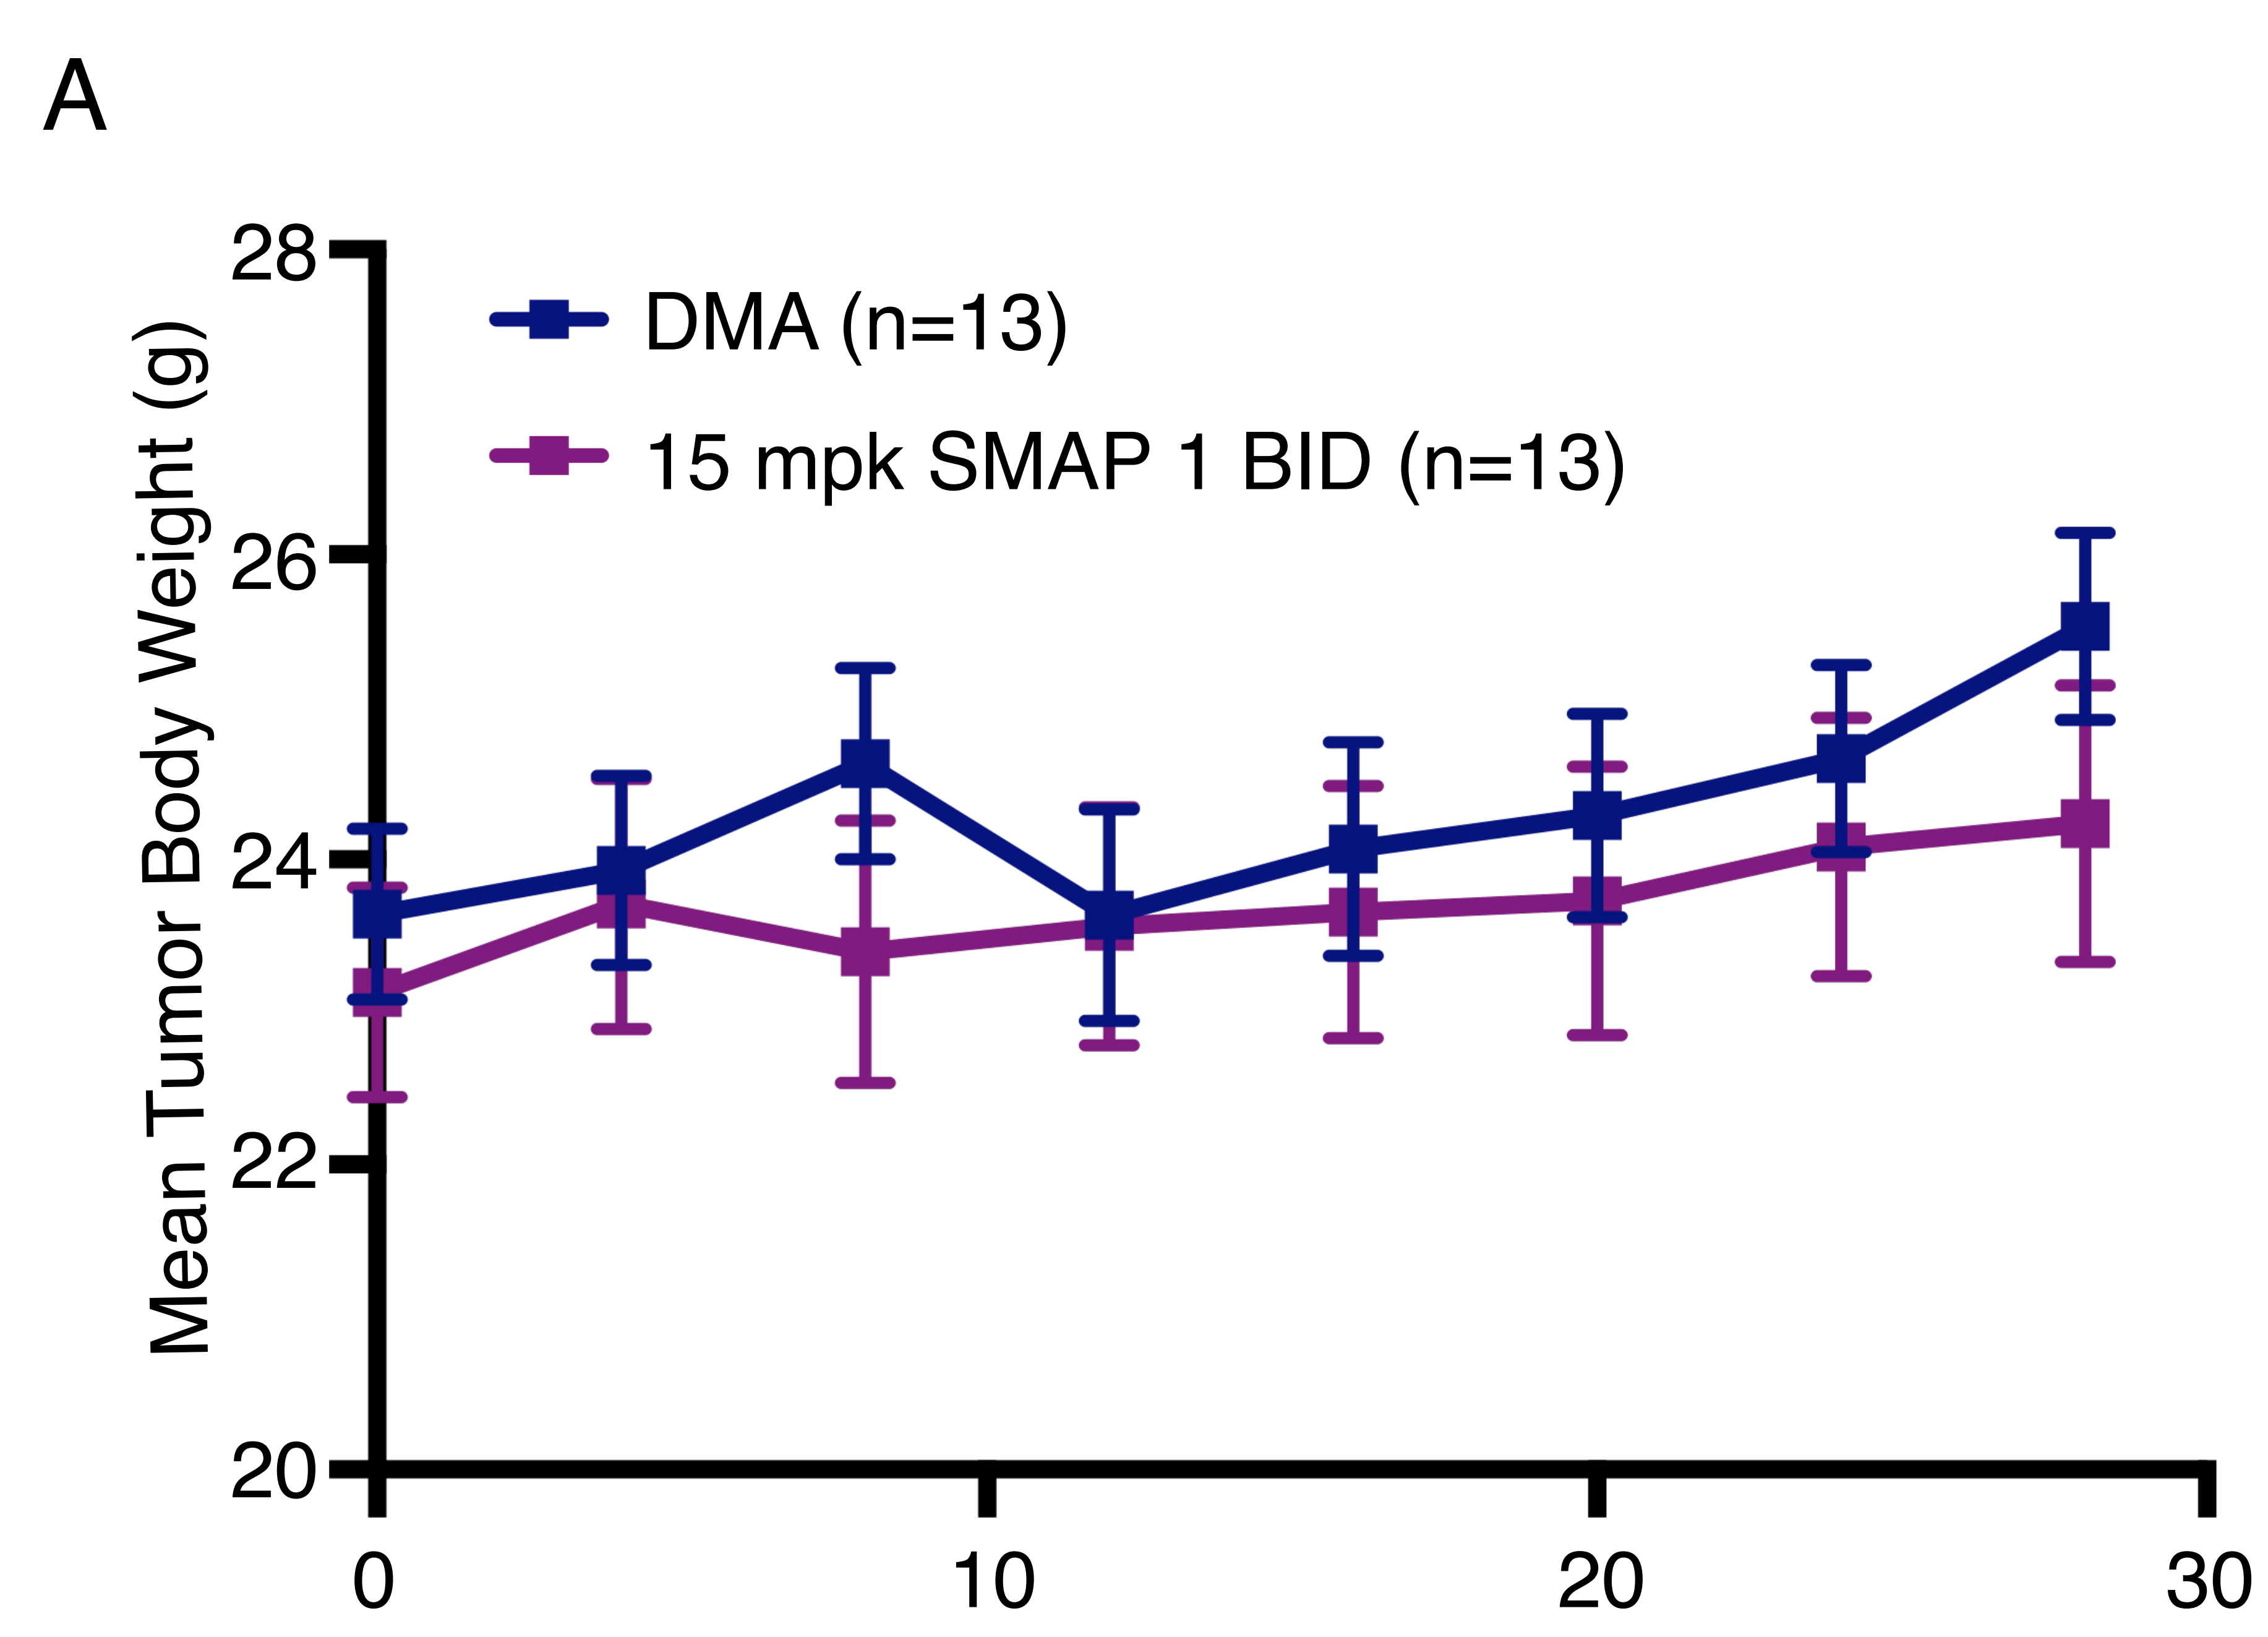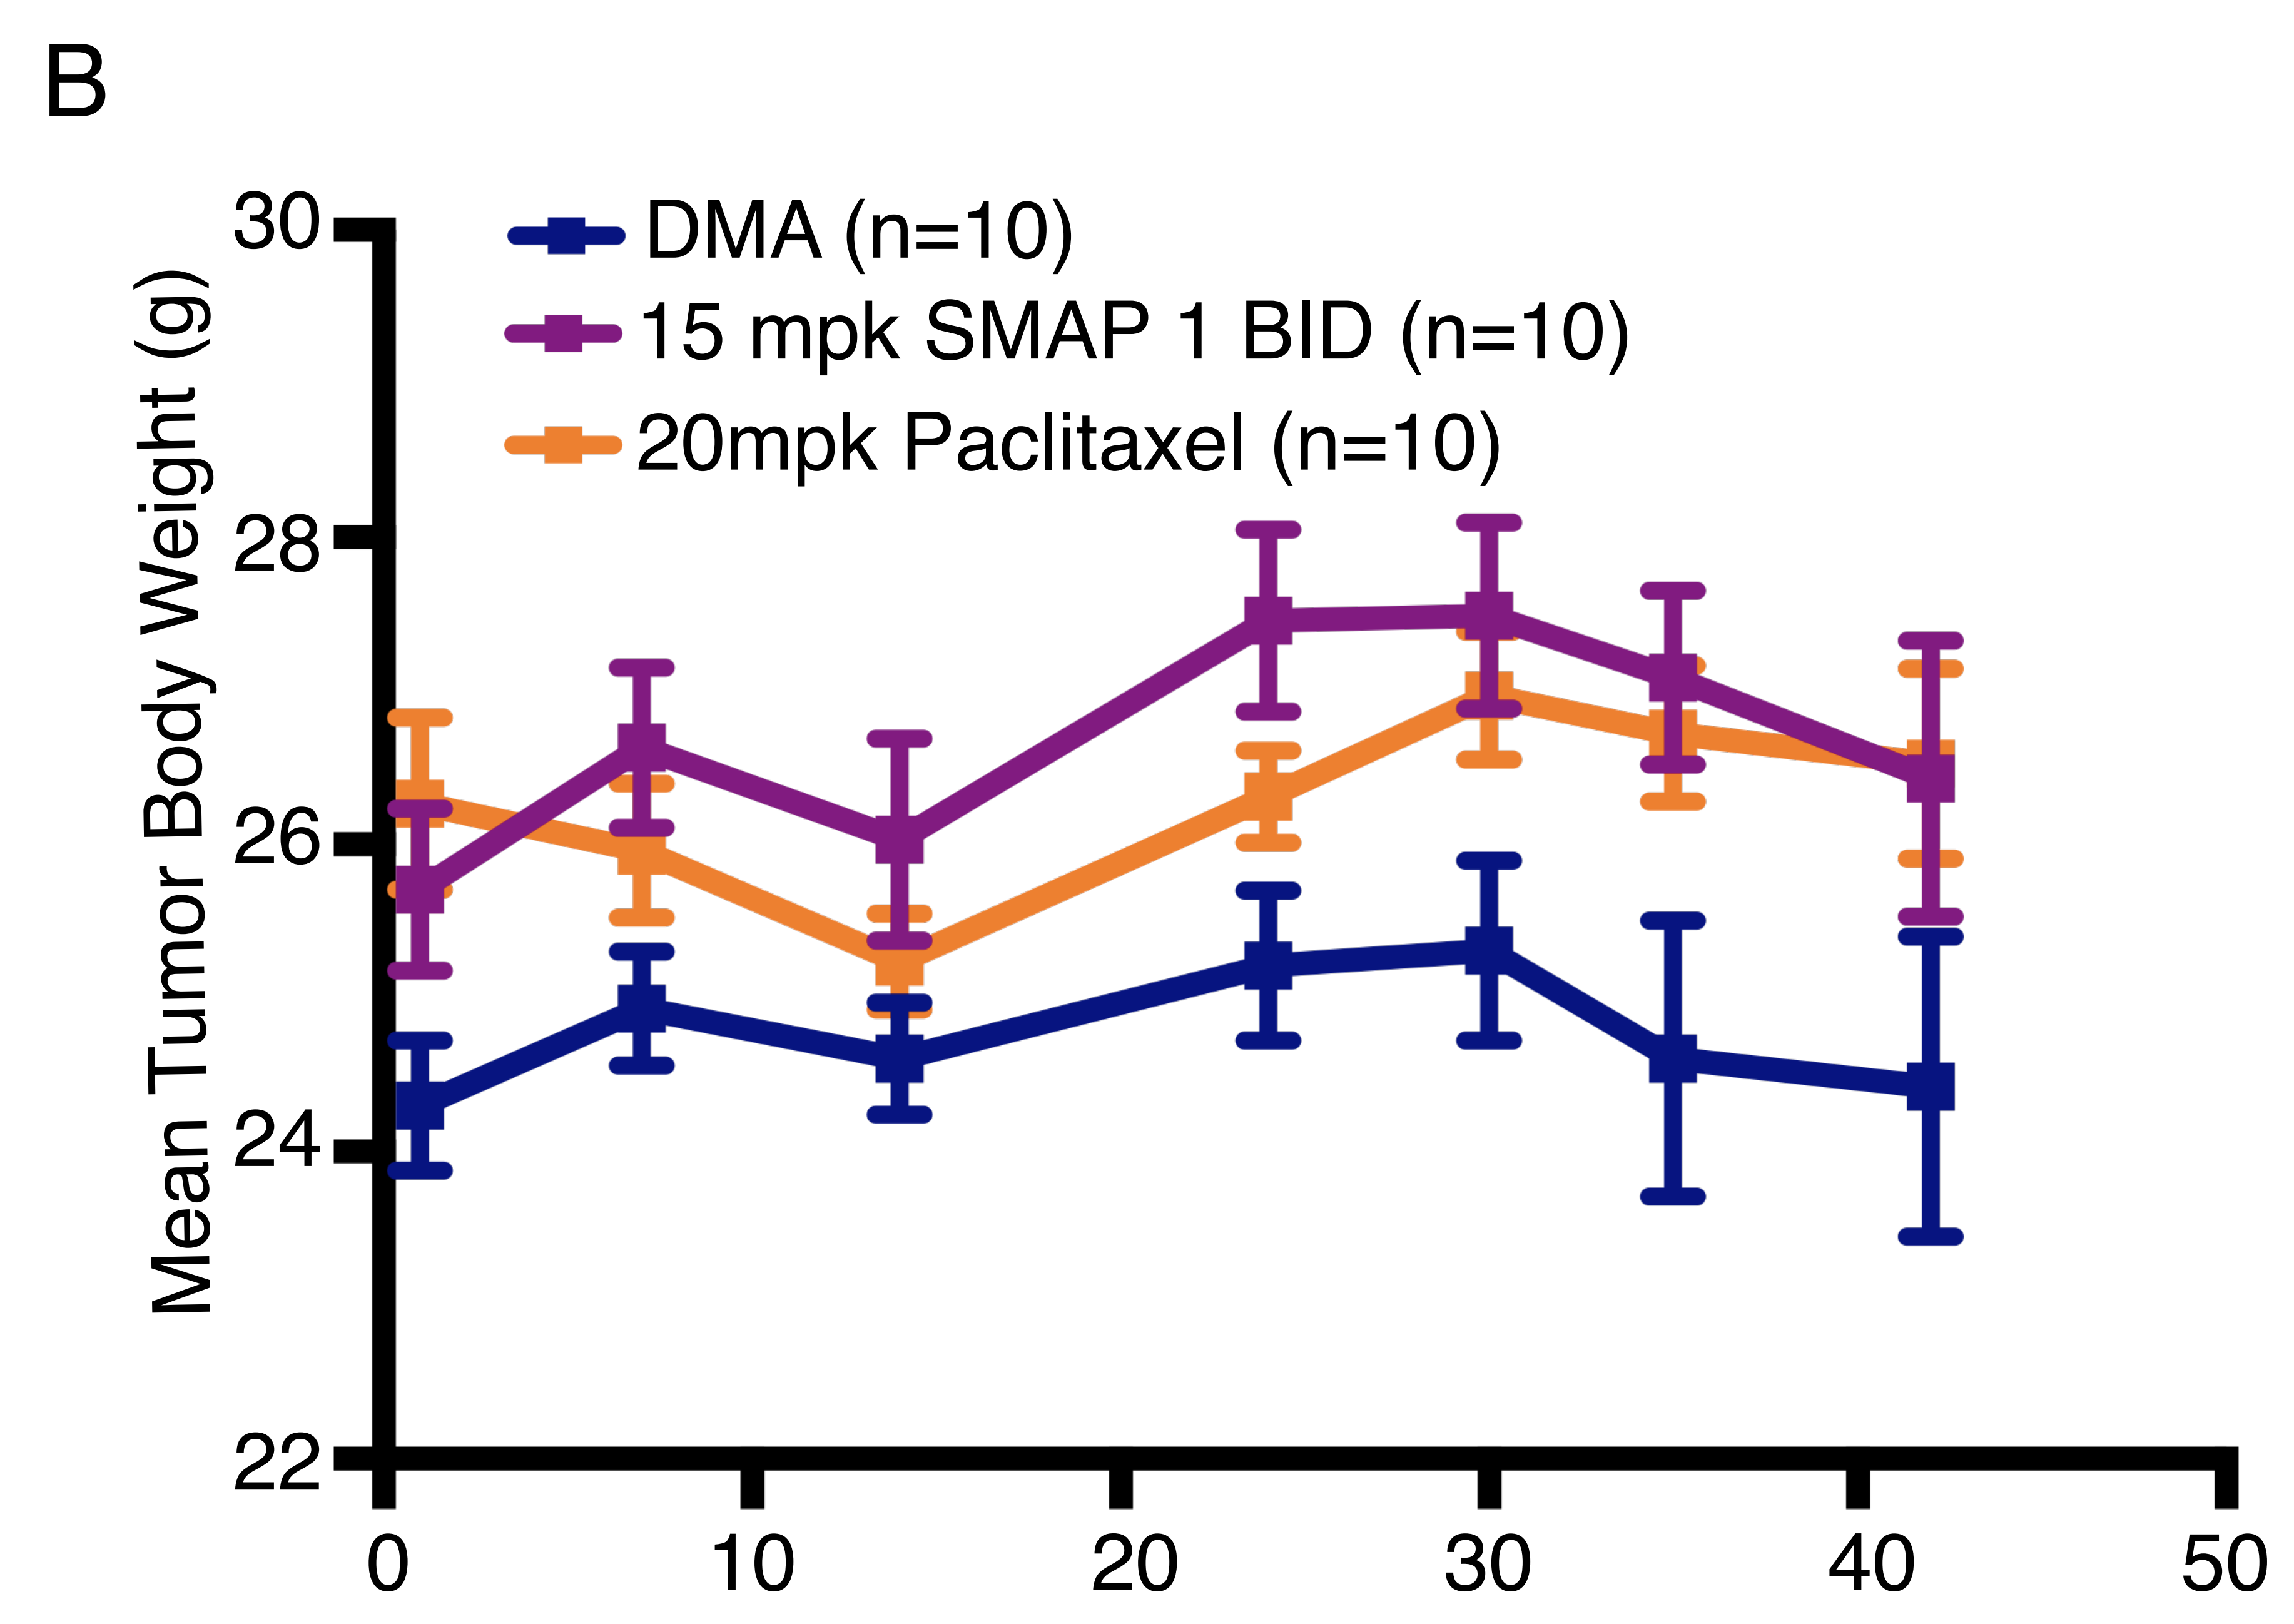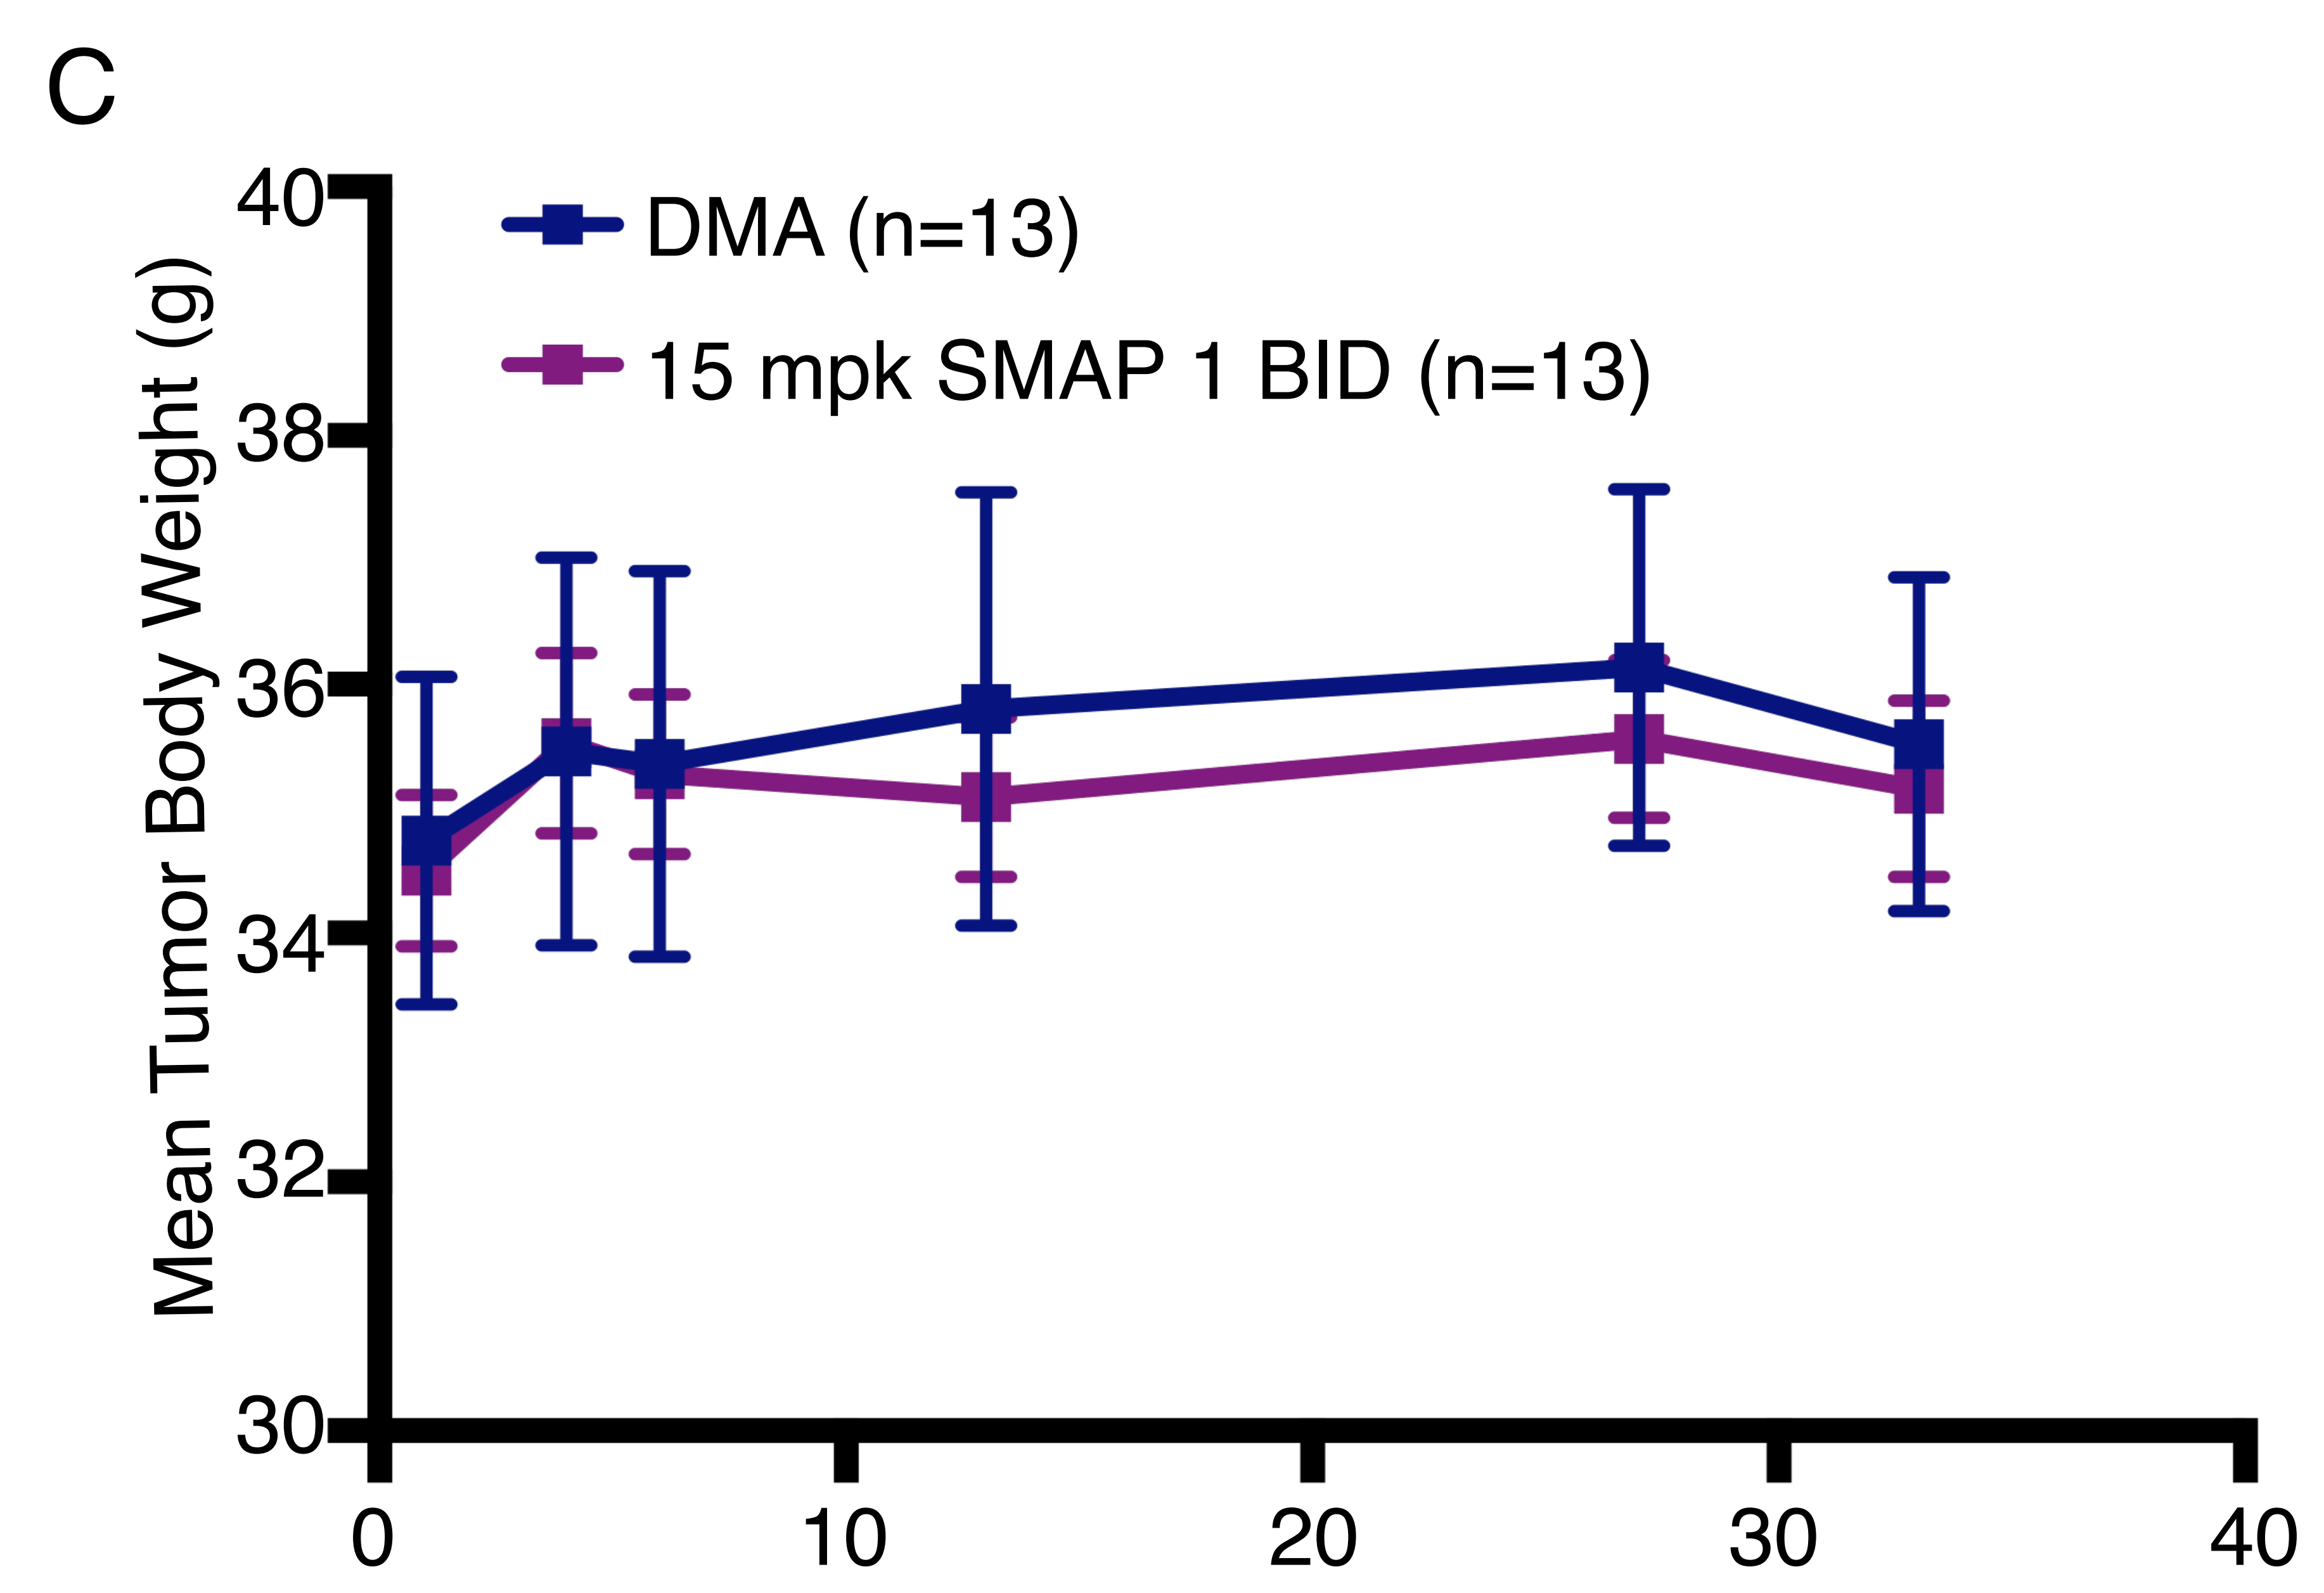

**Supplemental Figure 2. SMAPs do not affect mouse body weight.** (A) Changes in mouse weight over the course of the Daudi xenograft study (B) the MDA-MB-231 study and (C) the MDA-MB-453 study.

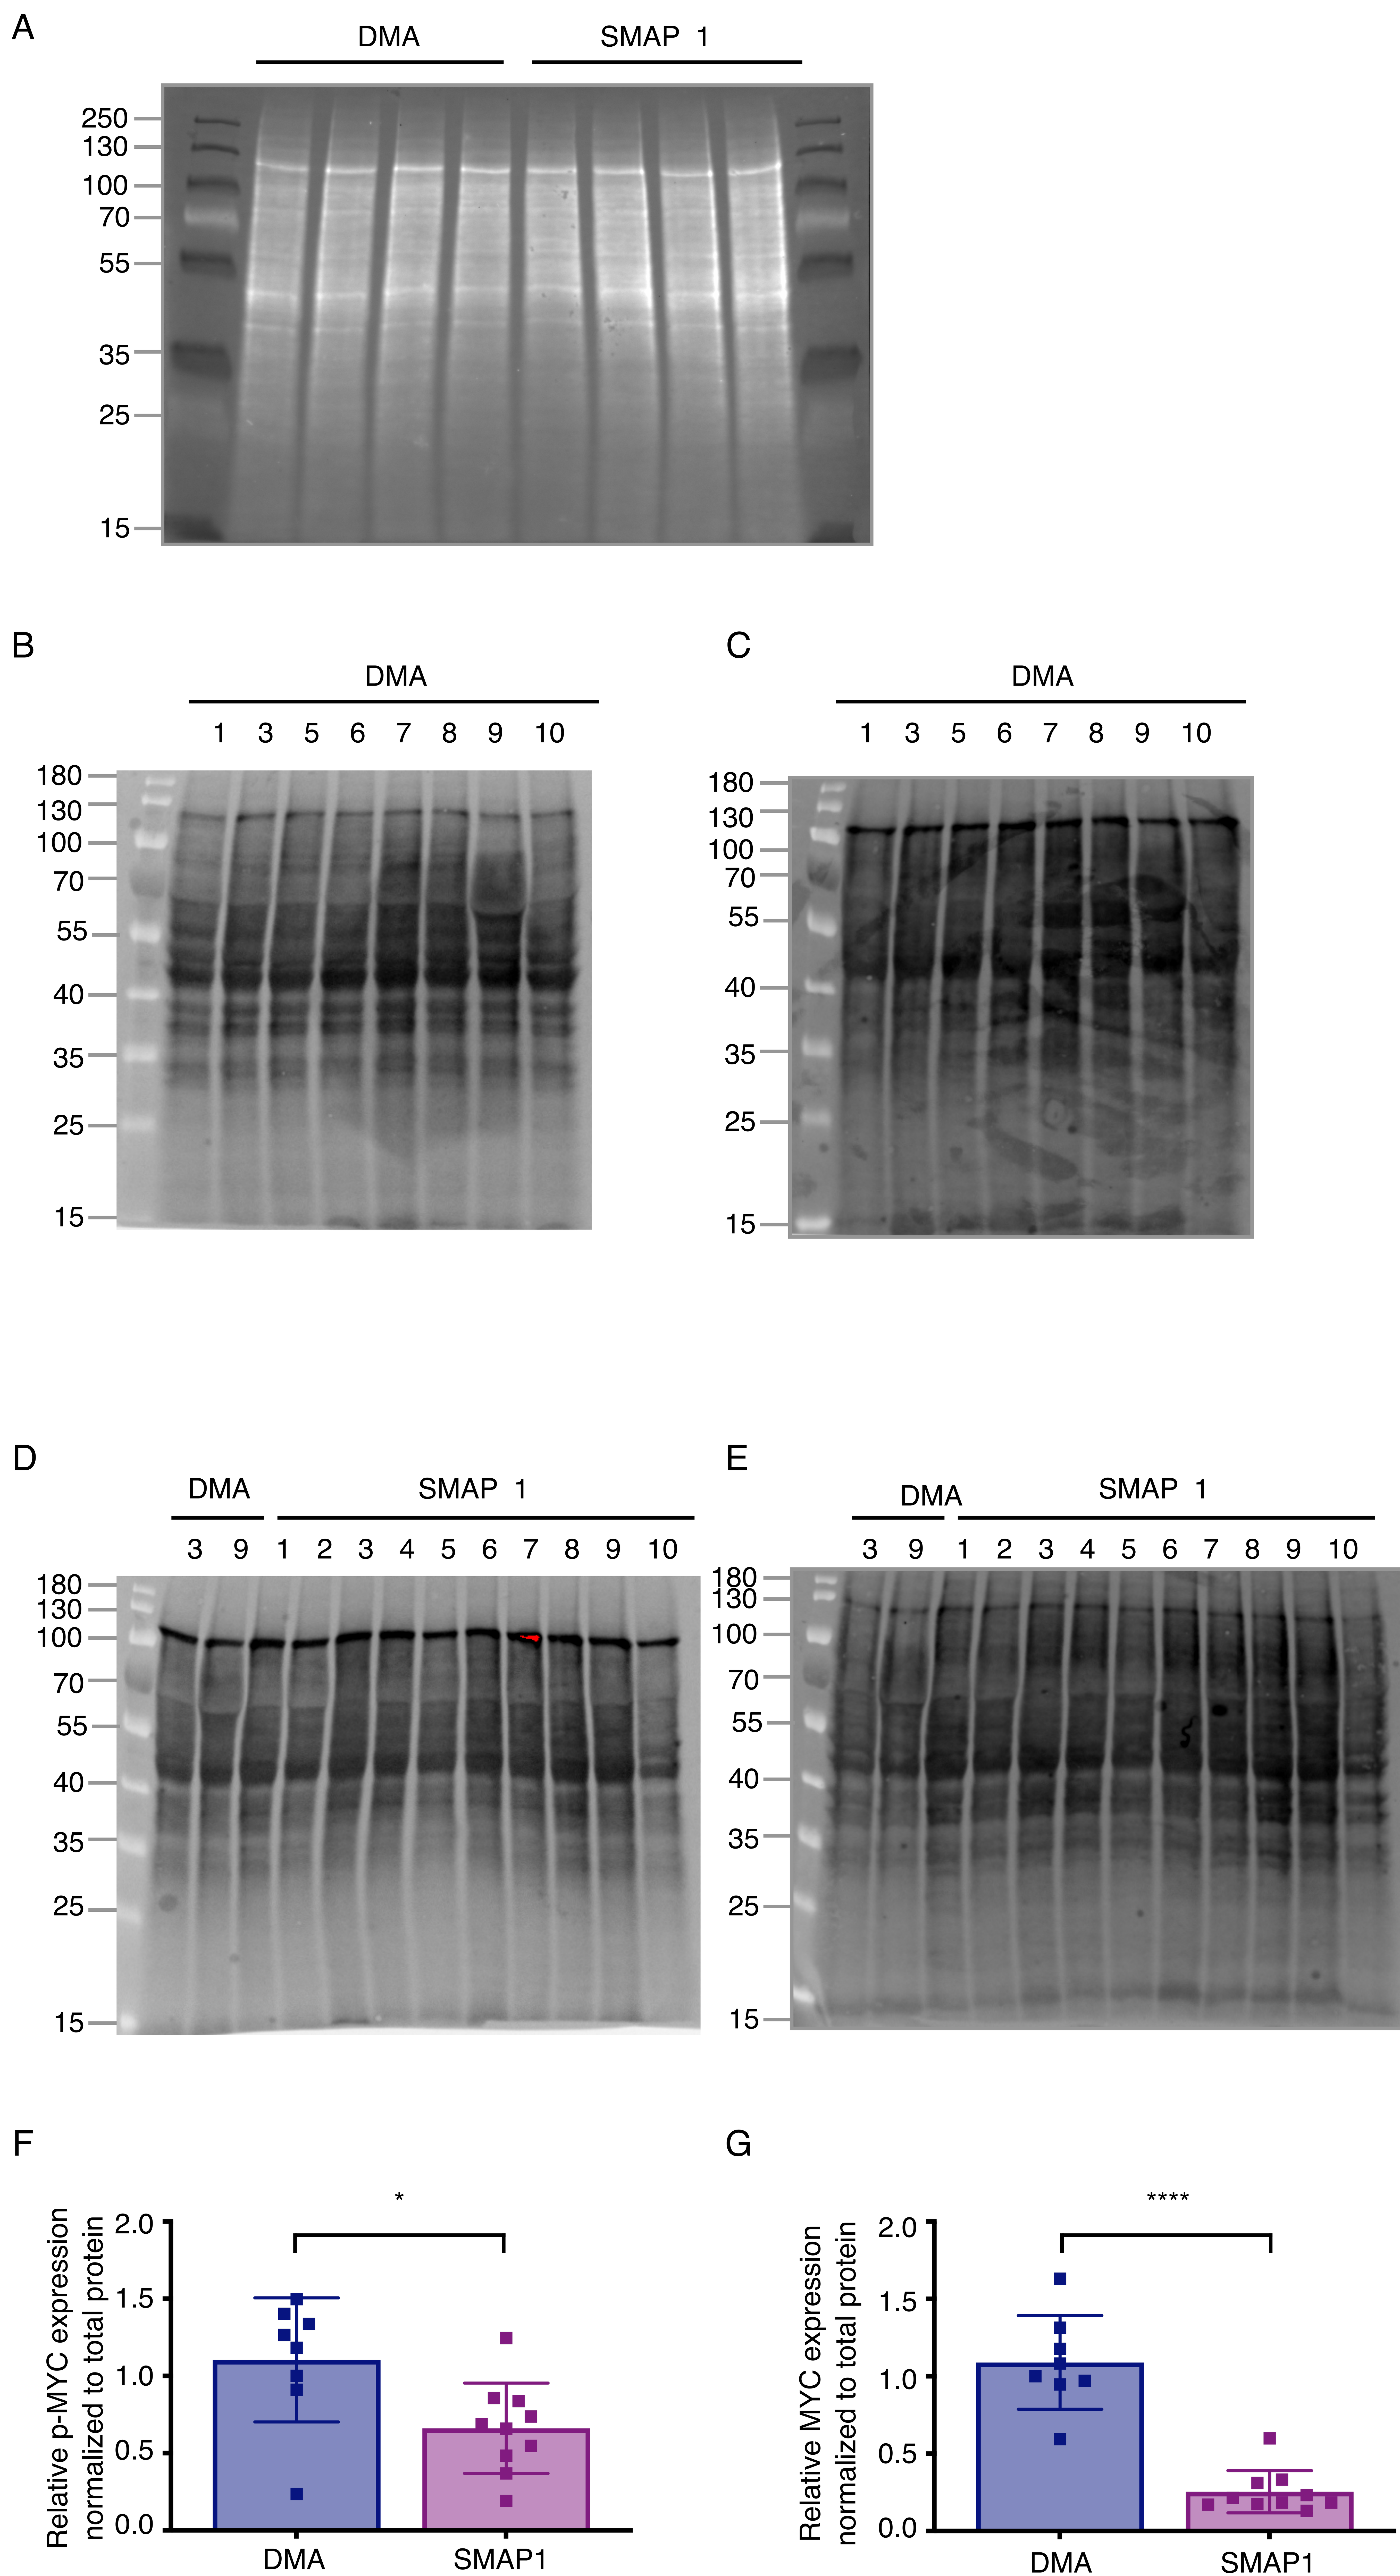

**Supplemental Figure 3.** (A) Image of membrane used for normalization of protein in Figure 1 C,D. (B) total protein loaded for figure 3C, phospho-MYC intensity in DMA tumors. (C) total protein loaded for Figure 3C western of total MYC in DMA tumors. (D) total protein loaded for figure 3C, phospho-MYC intensity in SMAP 1. treated vs DMA tumors. (E) total protein loaded for Figure 3C western of total MYC in SMAP 1 vs DMA tumors. (F) quantification of phospho MYC in figure 3C normalized to total protein and (G) quantification of total MYC in figure 3C normalized to total protein

A

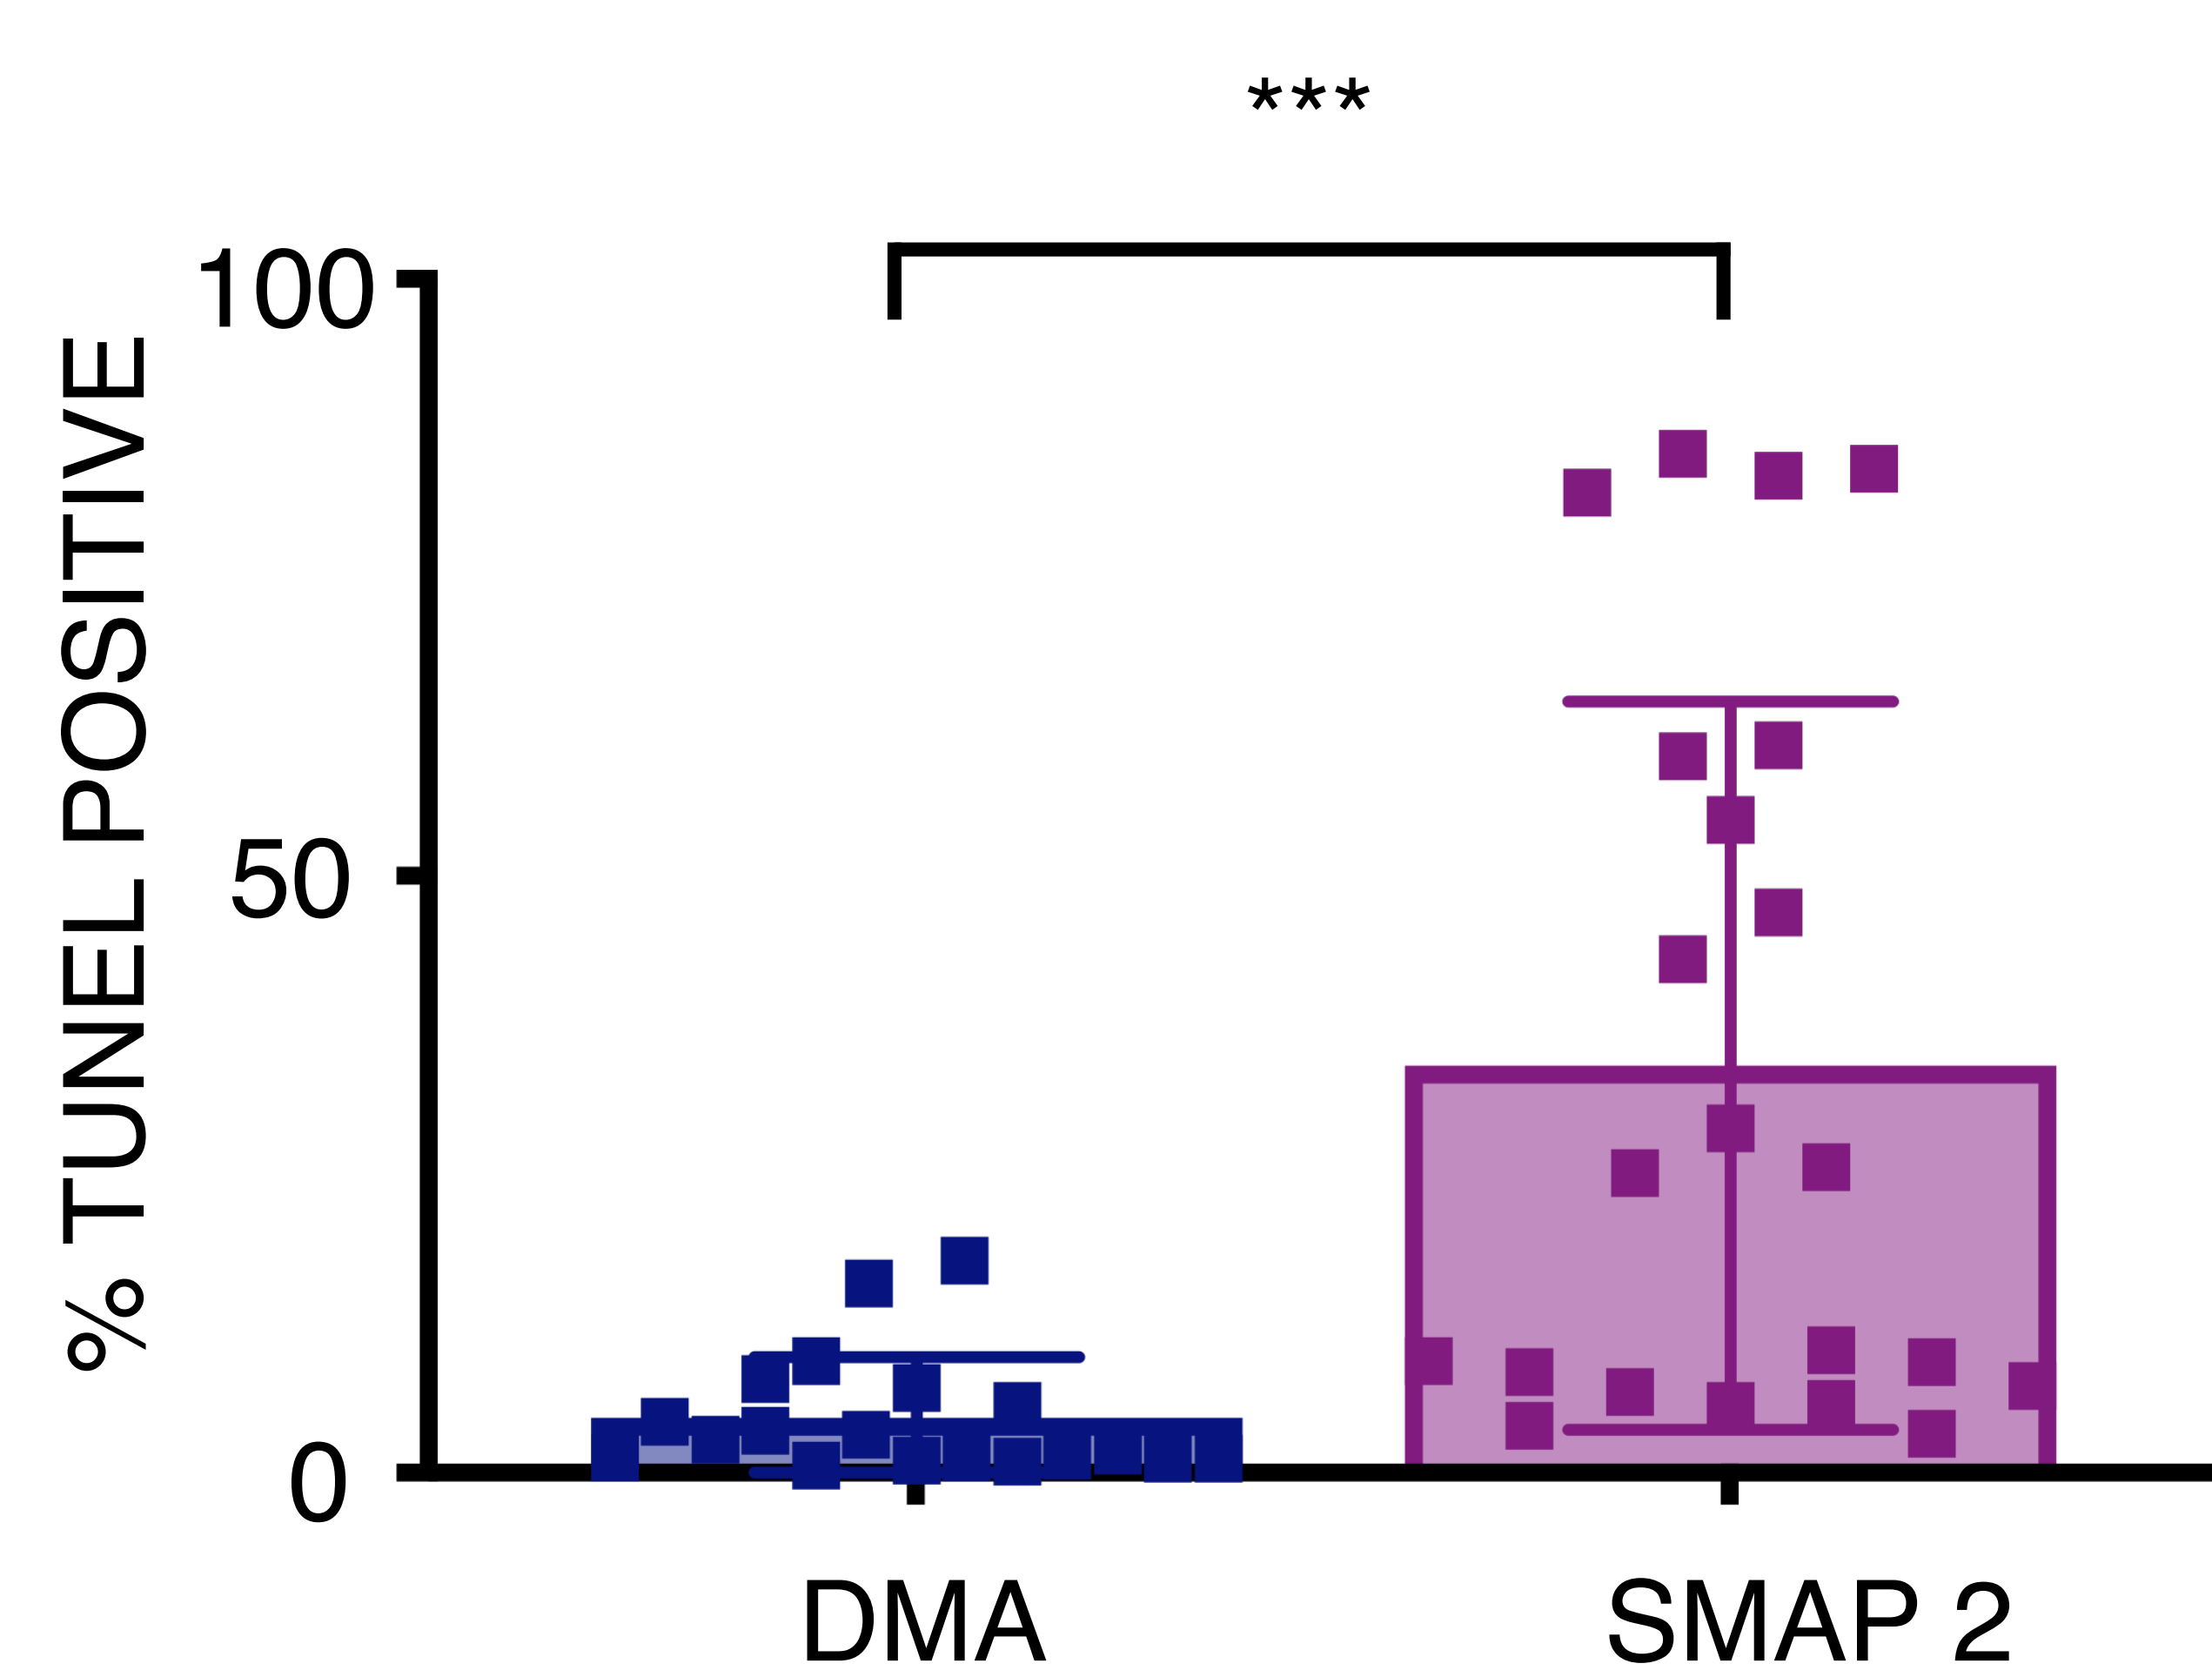

B

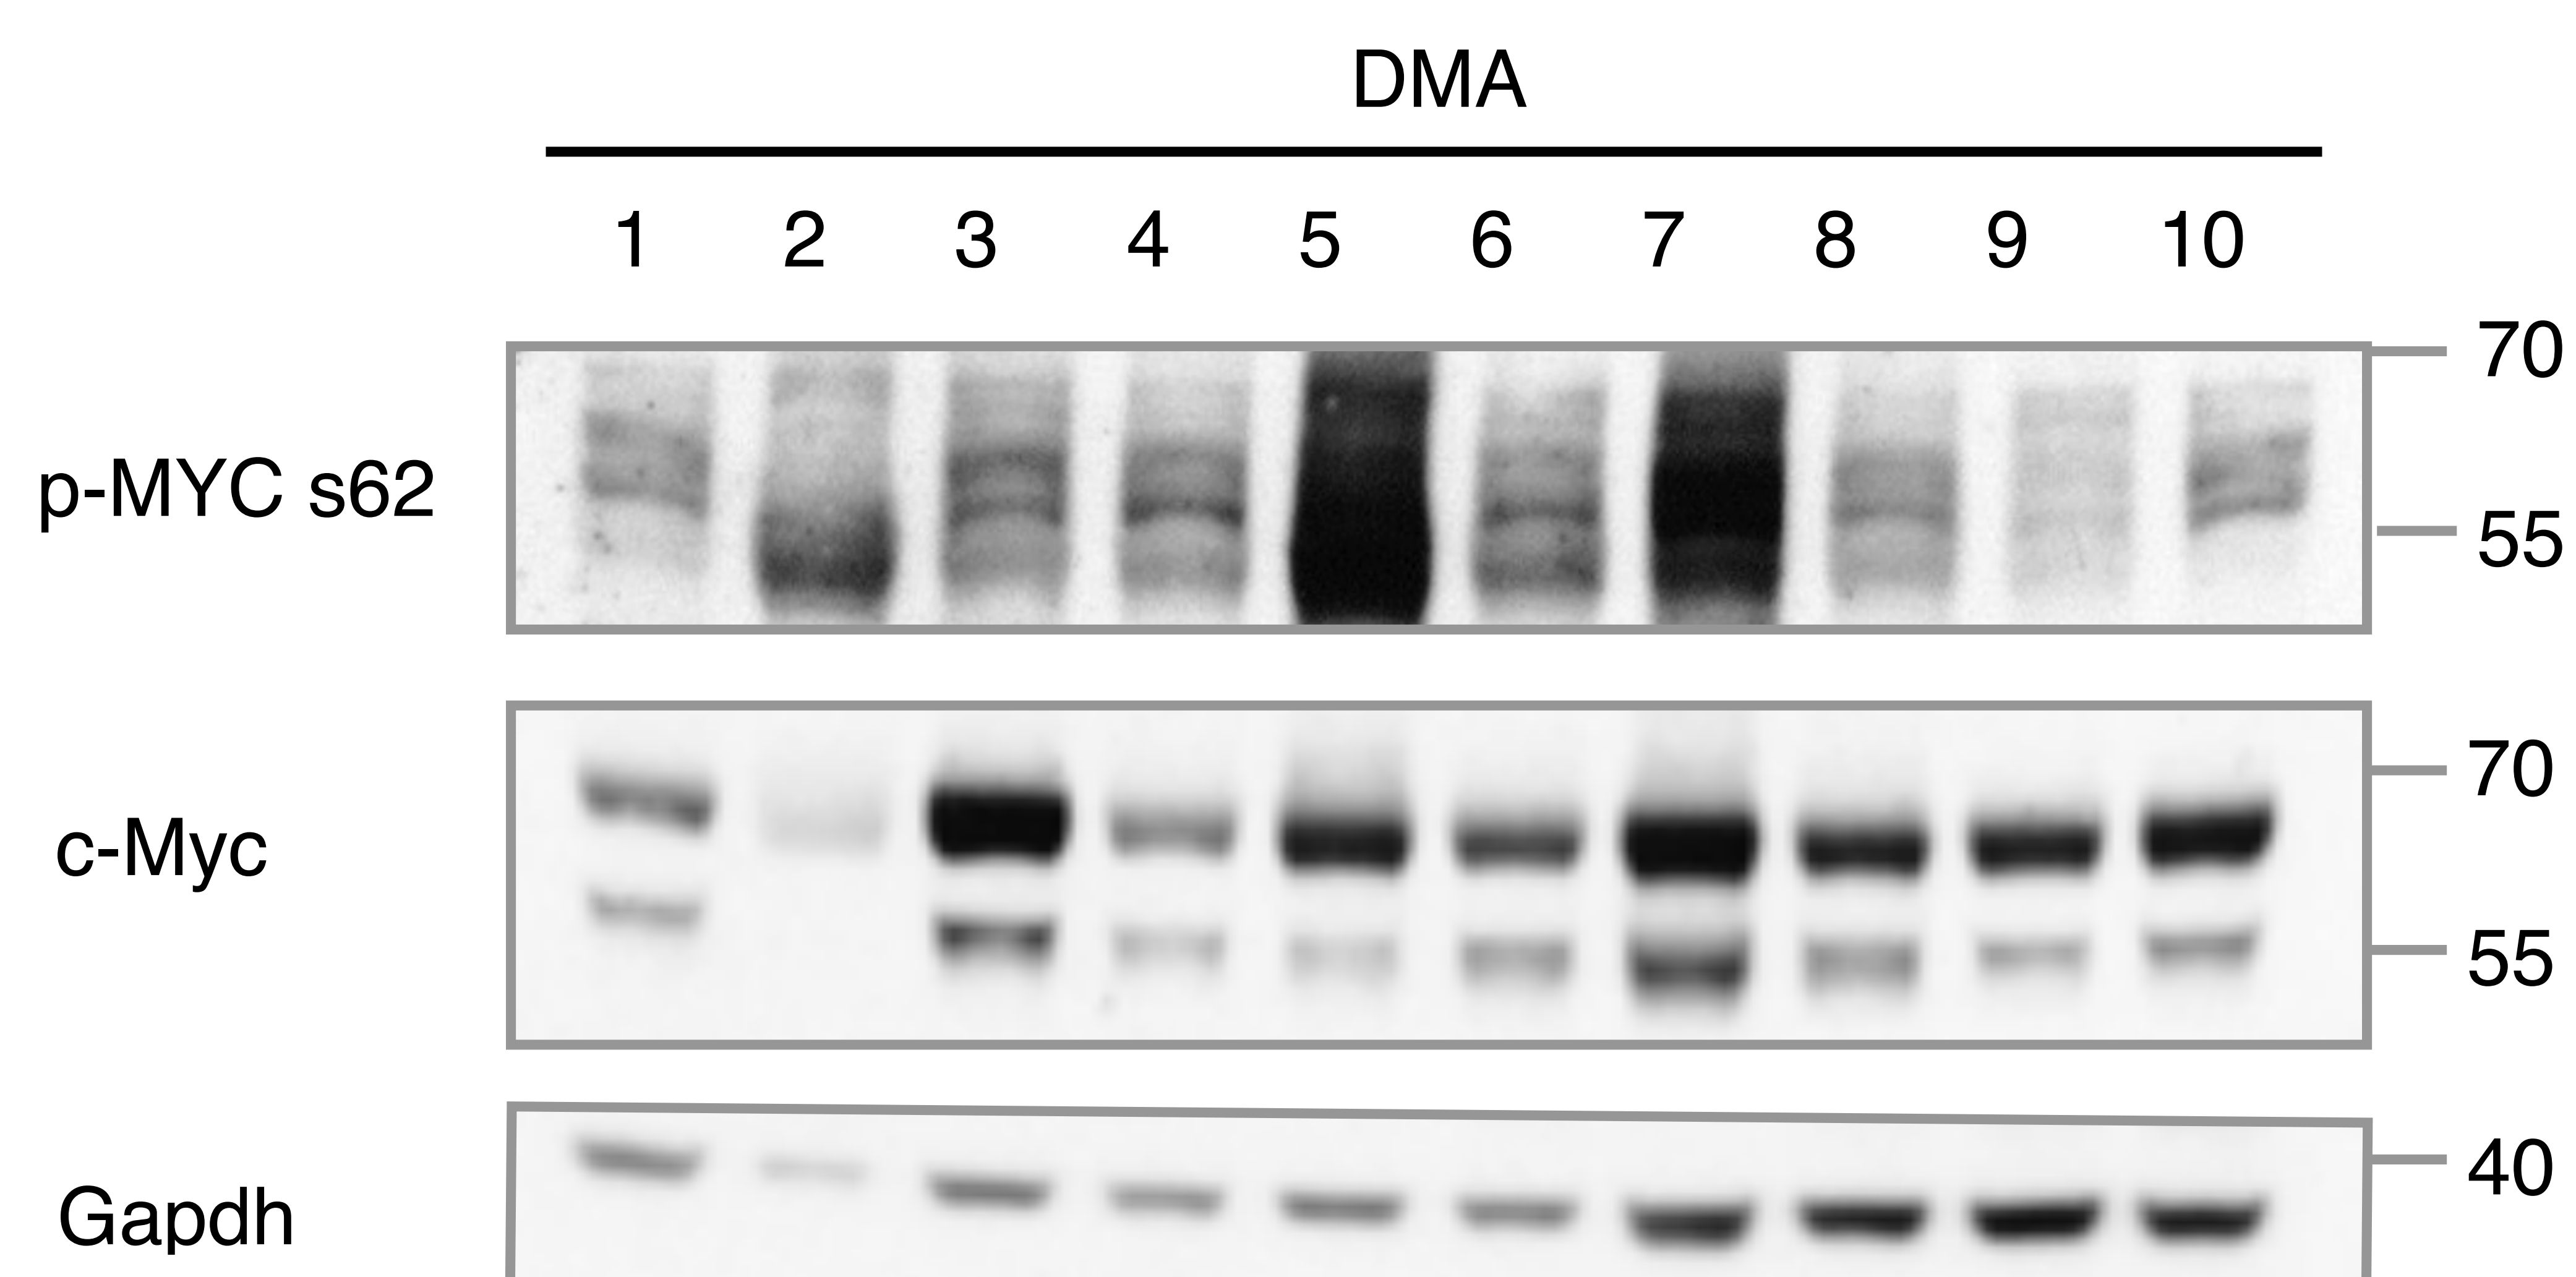

C

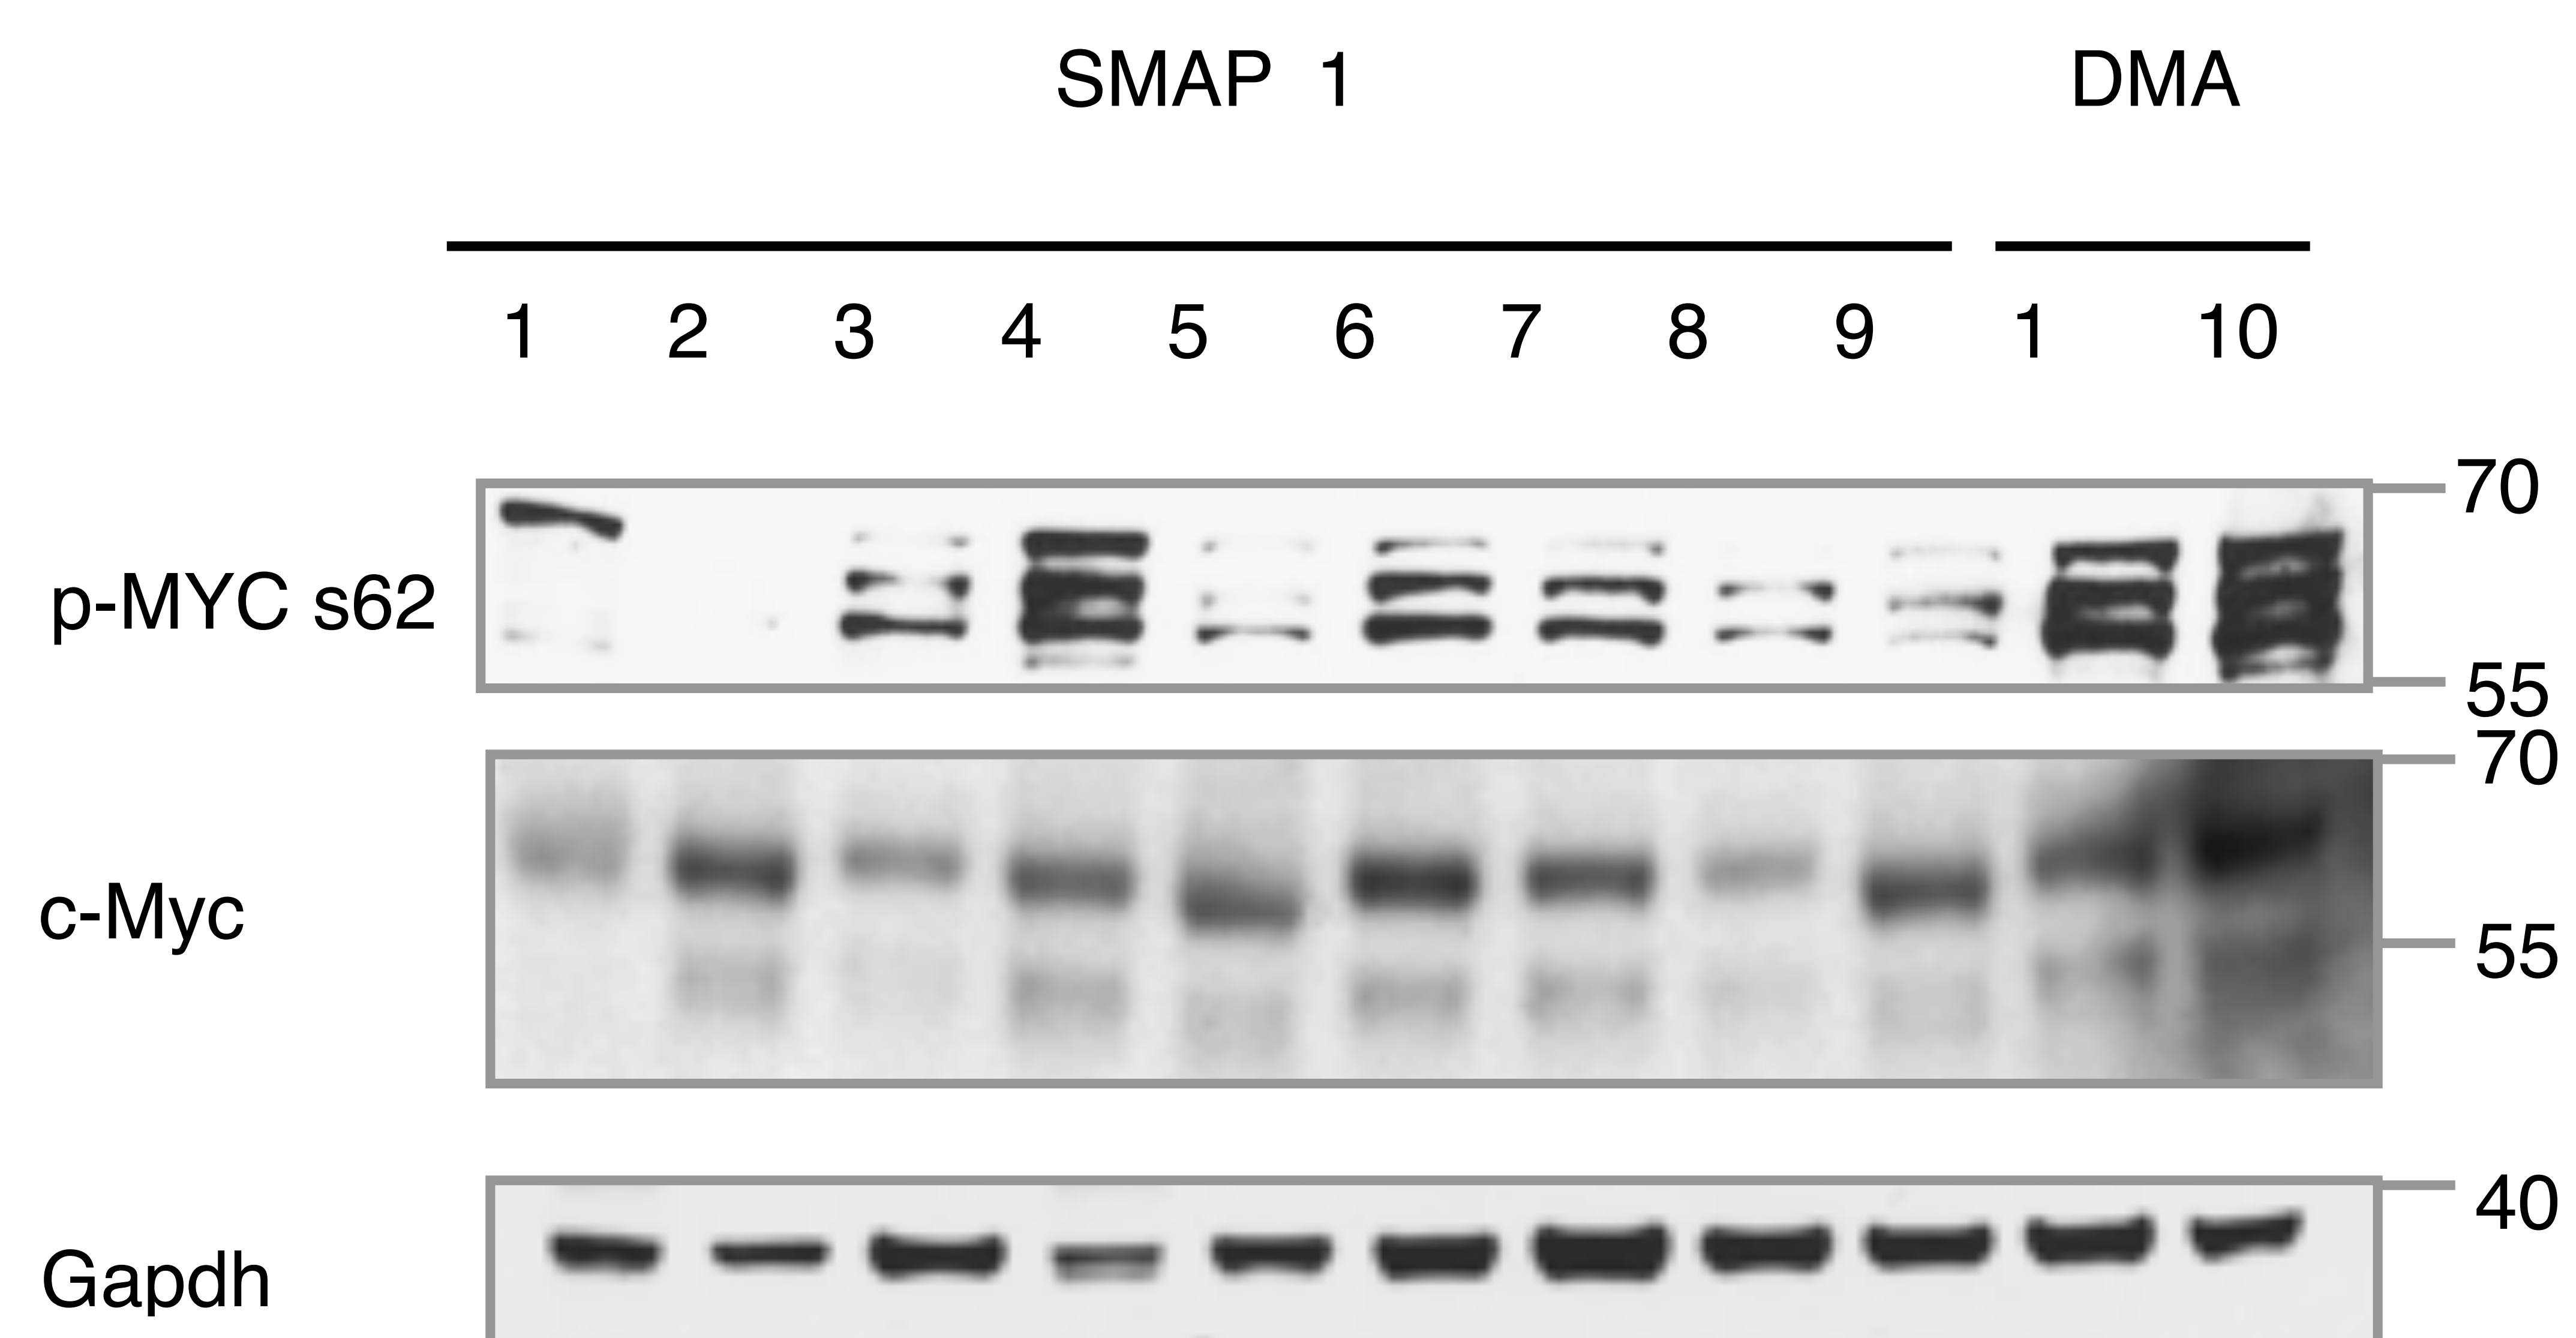

D

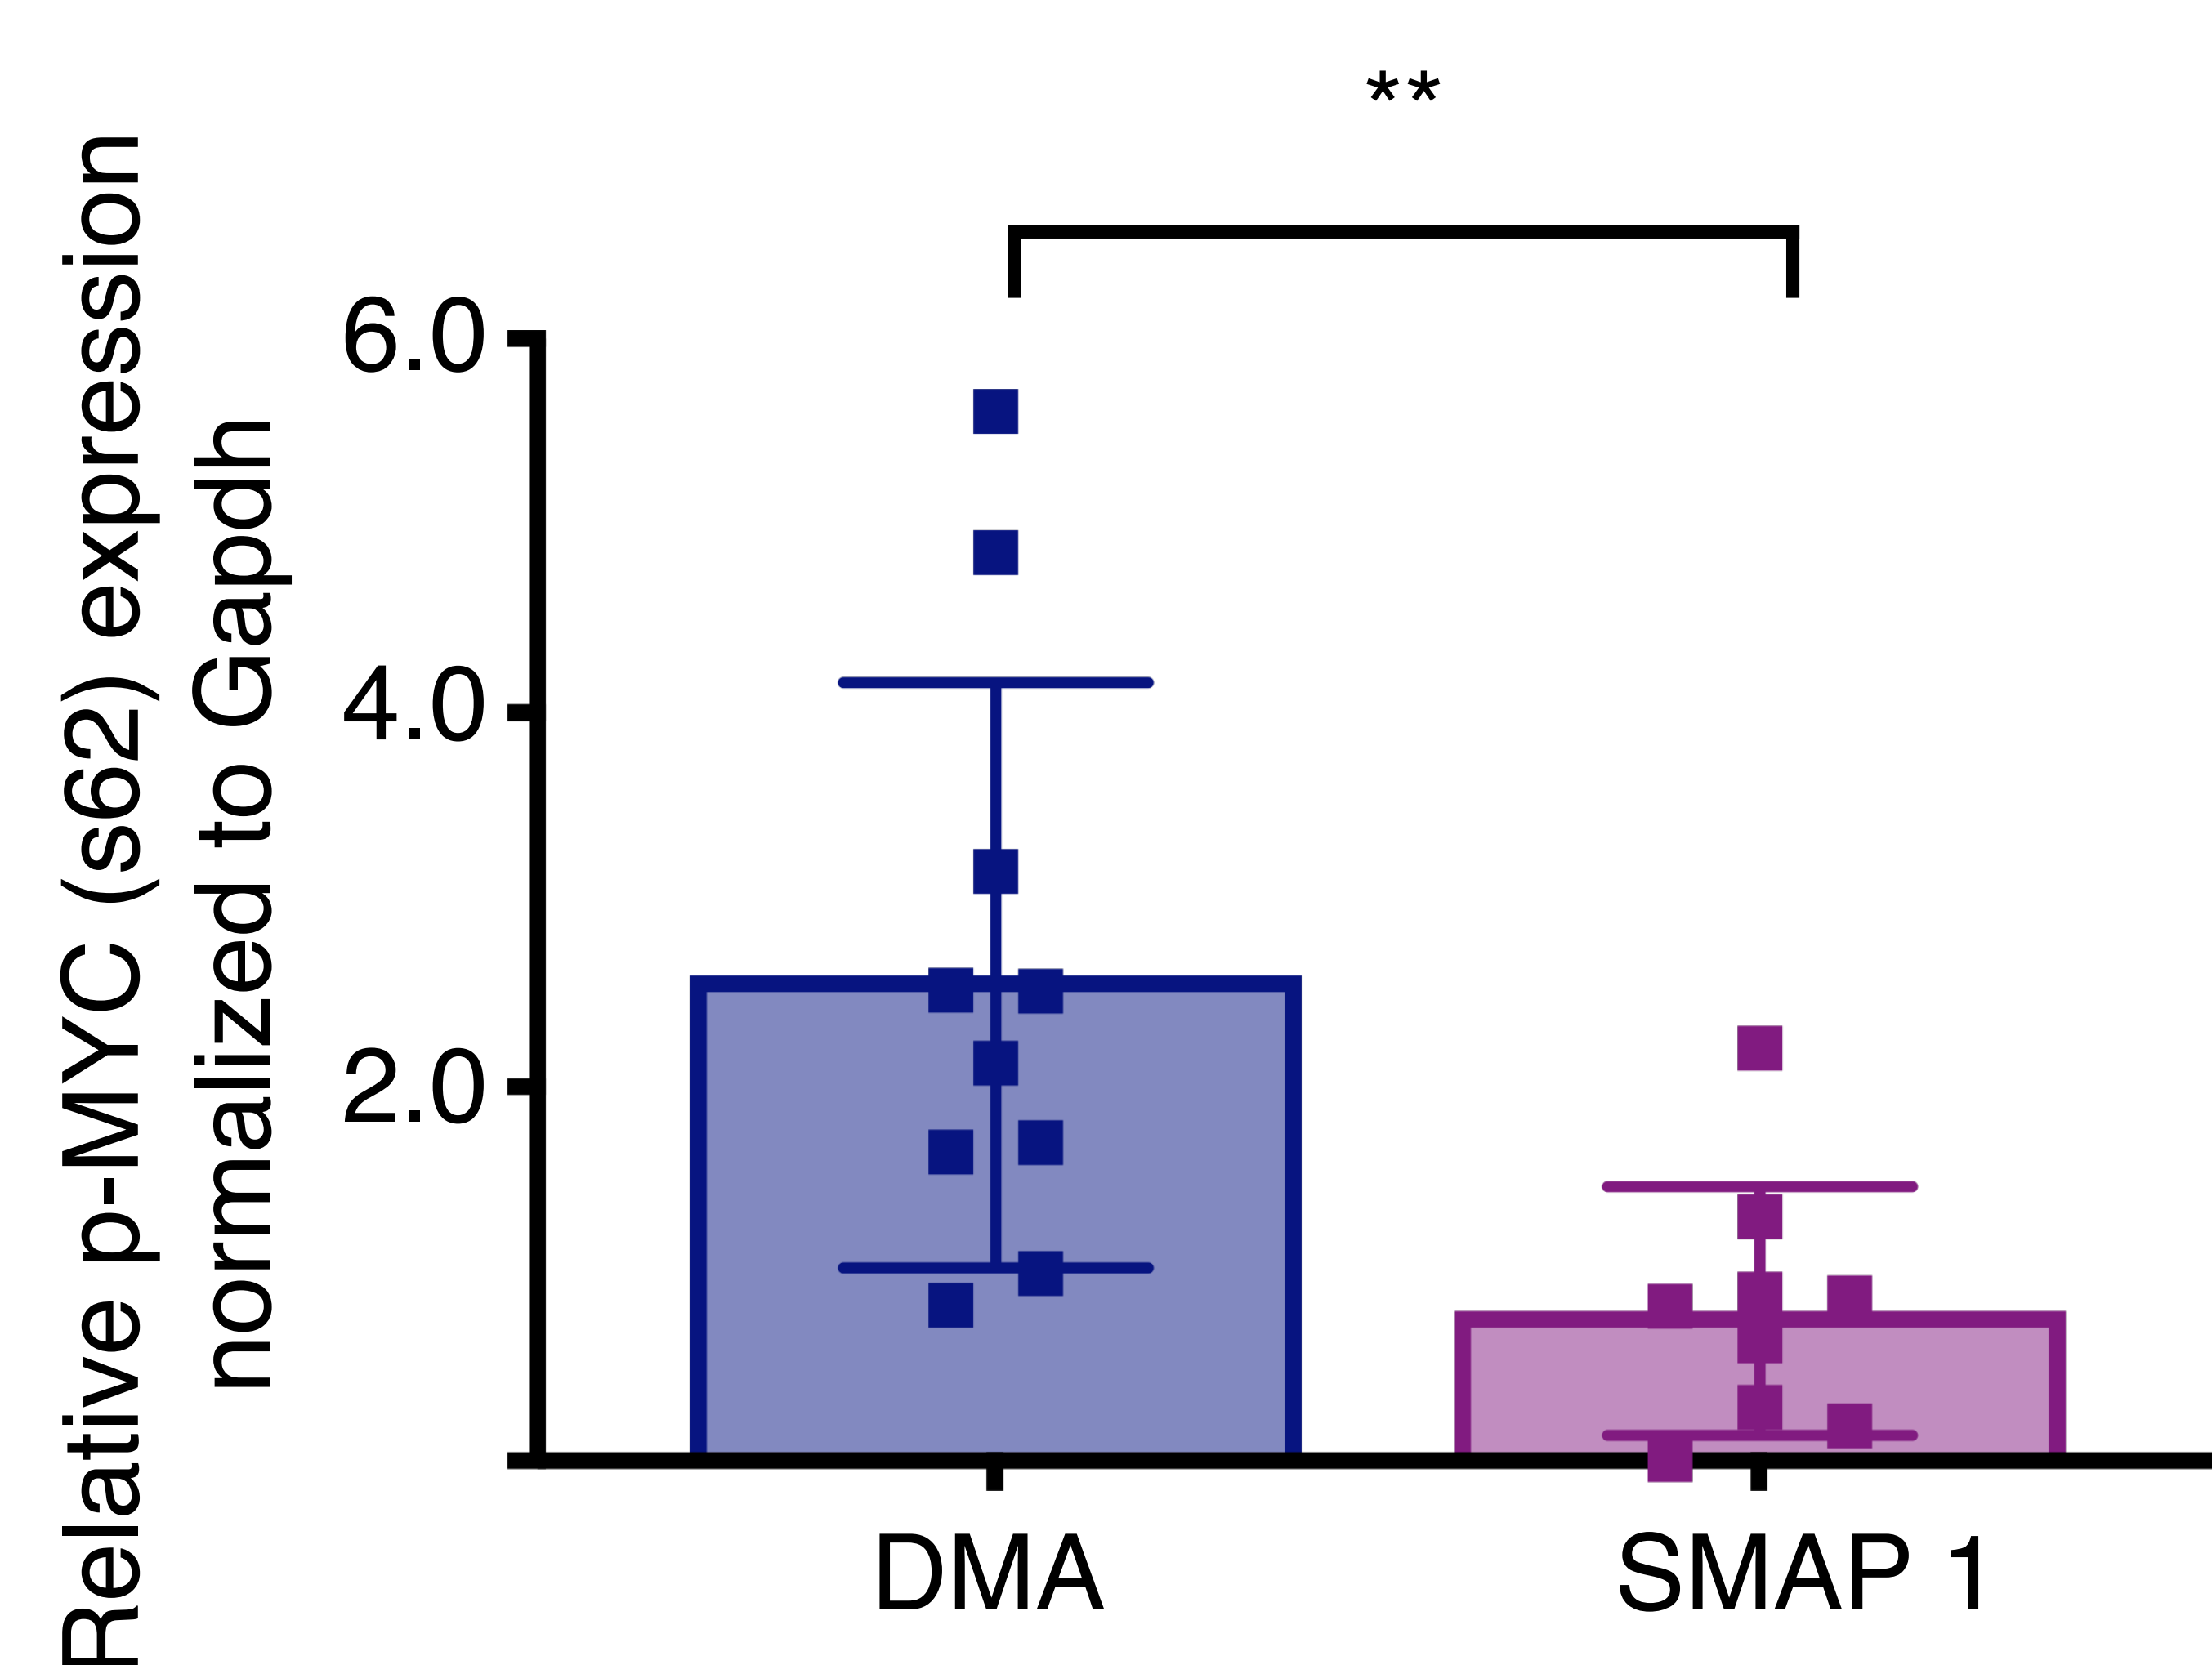

**Supplemental Figure 4 SMAP treatment increases TUNEL staining and decrease c-MYC protein expression in NSCLC mouse models upon treatment with SMAPs** (A) Quantification of TUNEL staining from the KRAS LA2 mouse model of NSCLC in DMA versus SMAP 2 treatment (B) Tumor lysates from H441 xenograft treated with DMA and (C) SMAP 1 vs DMA treatment assessed by western blot for phospho c-MYC and total c-MYC protein expression. (D) Quantification of phospho-MYC expression Tumors normalized in quantification to DMA lysate 10 (quantification of total MYC shown in figure 2J). Respective quantifications are represented as mean  $\pm$  SD. \*  $P < 0.05$  \*\* $P < 0.01$ ; \*\*\* $P < 0.001$ .

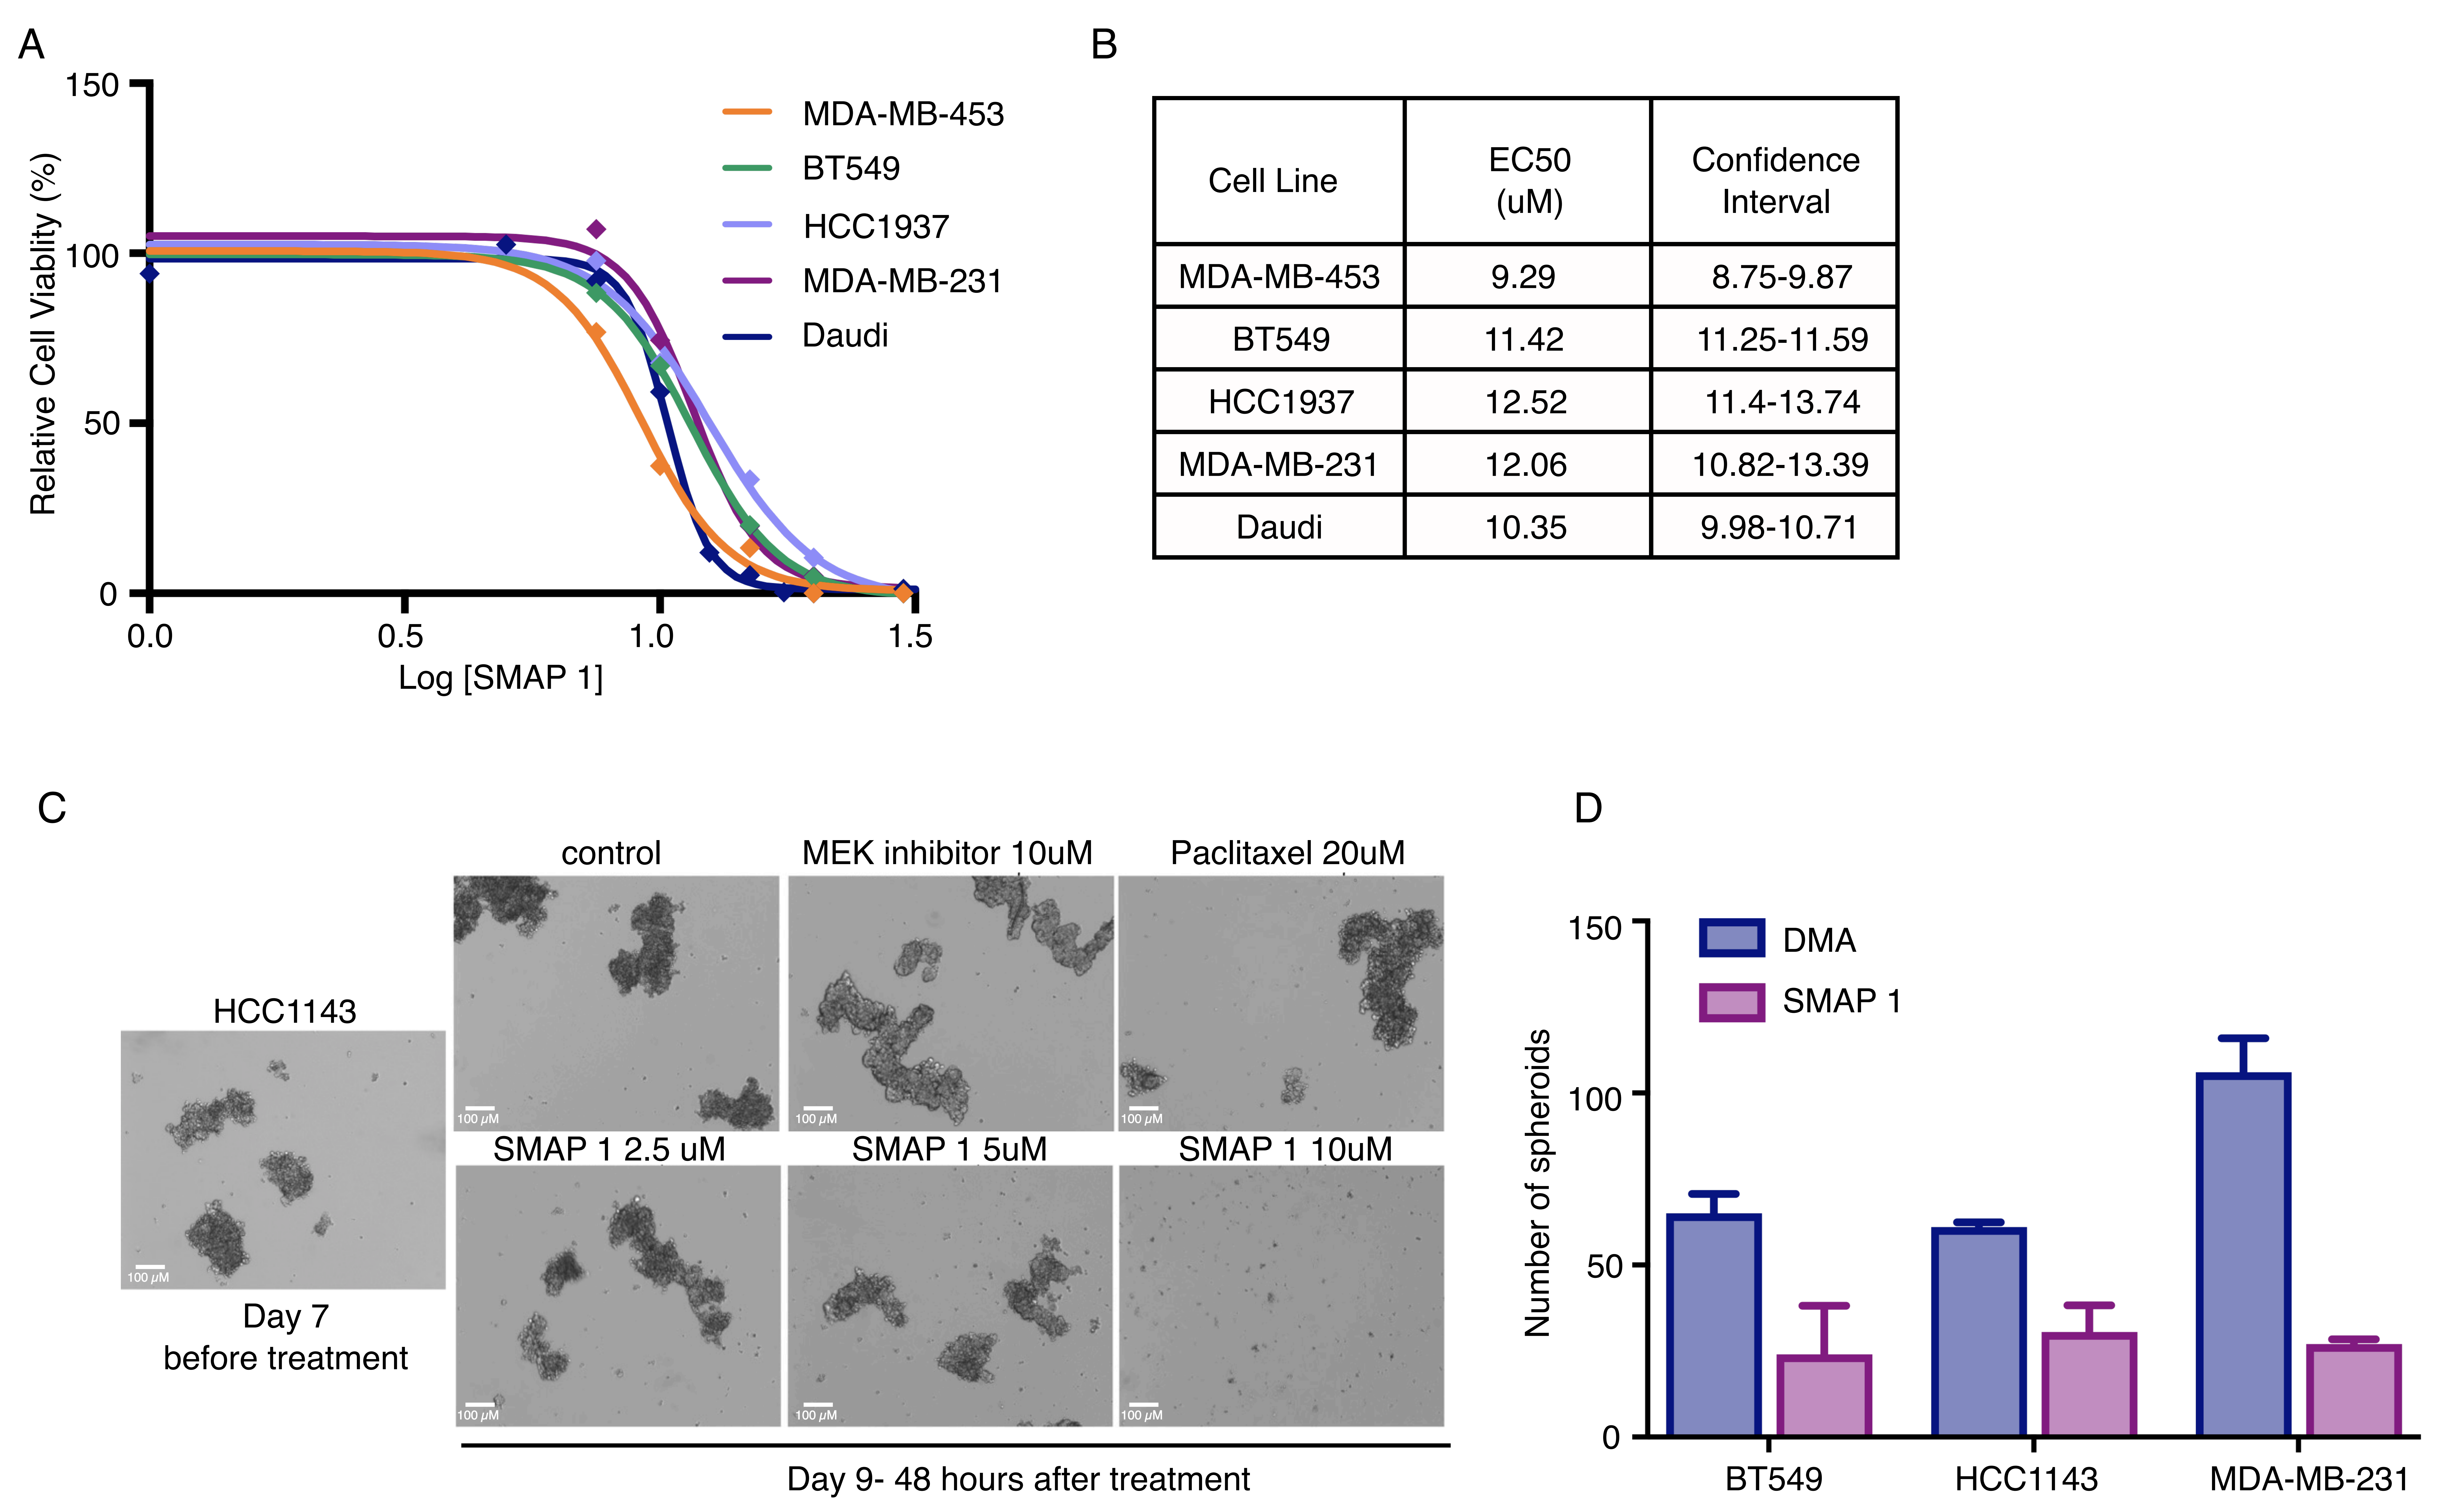

**Supplemental Figure 5. SMAPs decrease cellular viability and spheroid growth in panel of cancer cell lines** MTS and MTT viability assays in a panel of Burkitts and breast cancer cell lines upon treatment with varying concentrations of SMAP 1 (A) and calculation of EC50s in (B) Representative image of a mammosphere assay in HCC1143 treated with SMAP 1, MEK inhibitor or Paclitaxel (C) and quantification of n=2 of spheroids upon SMAP treatment in a panel of breast cancer cell lines (D).

A

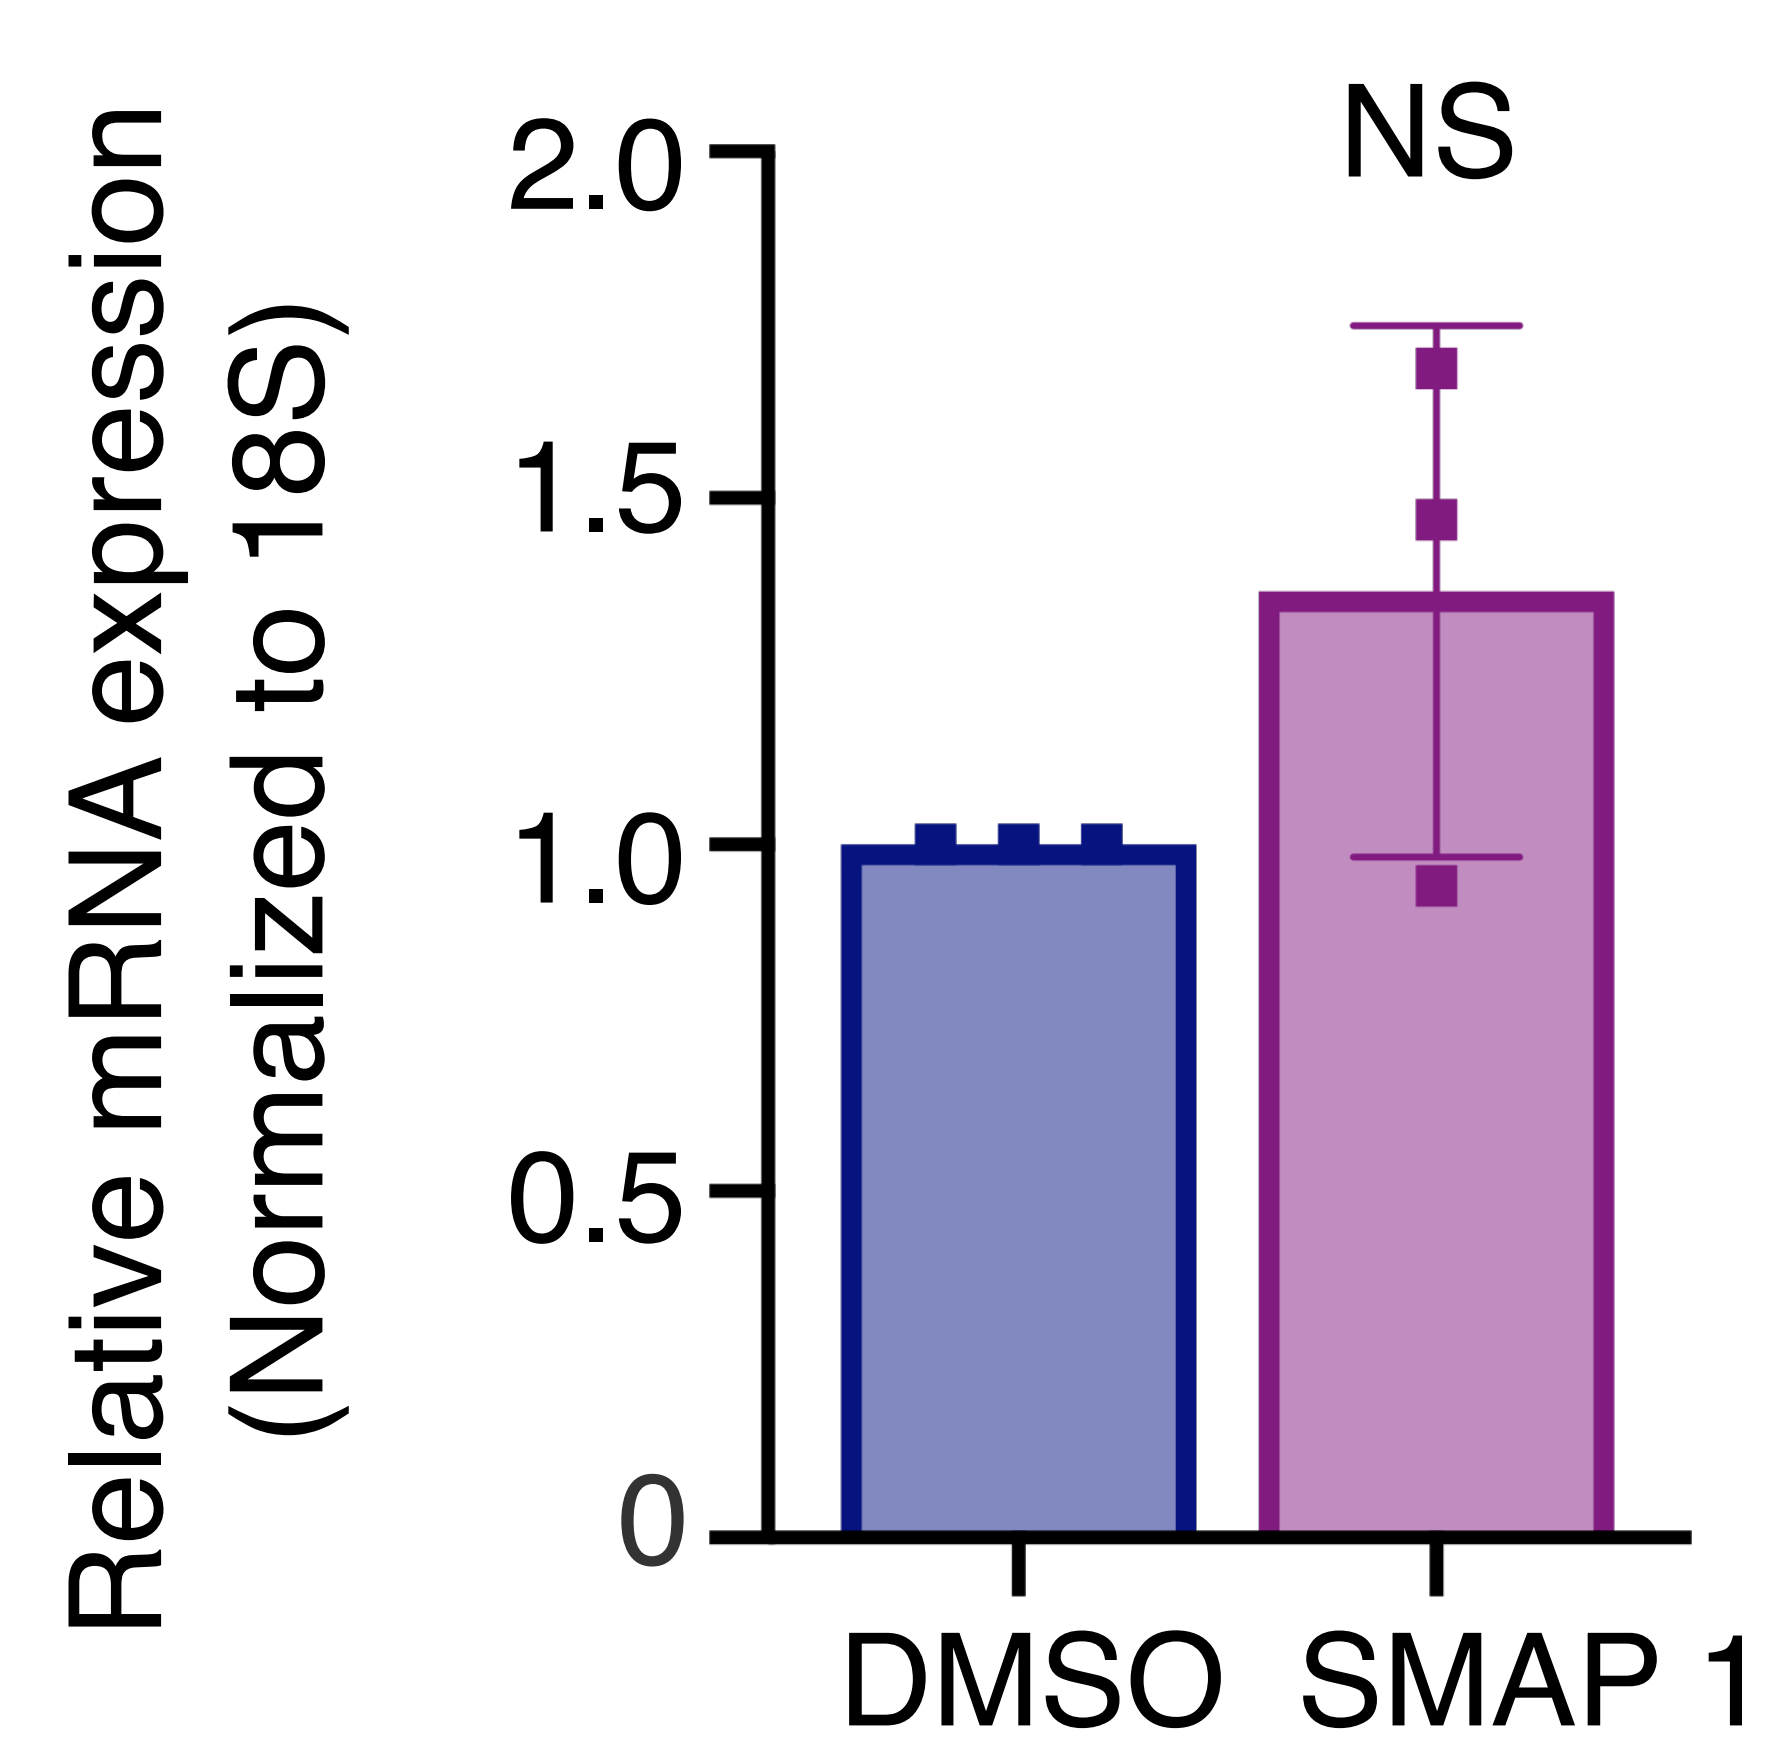

B

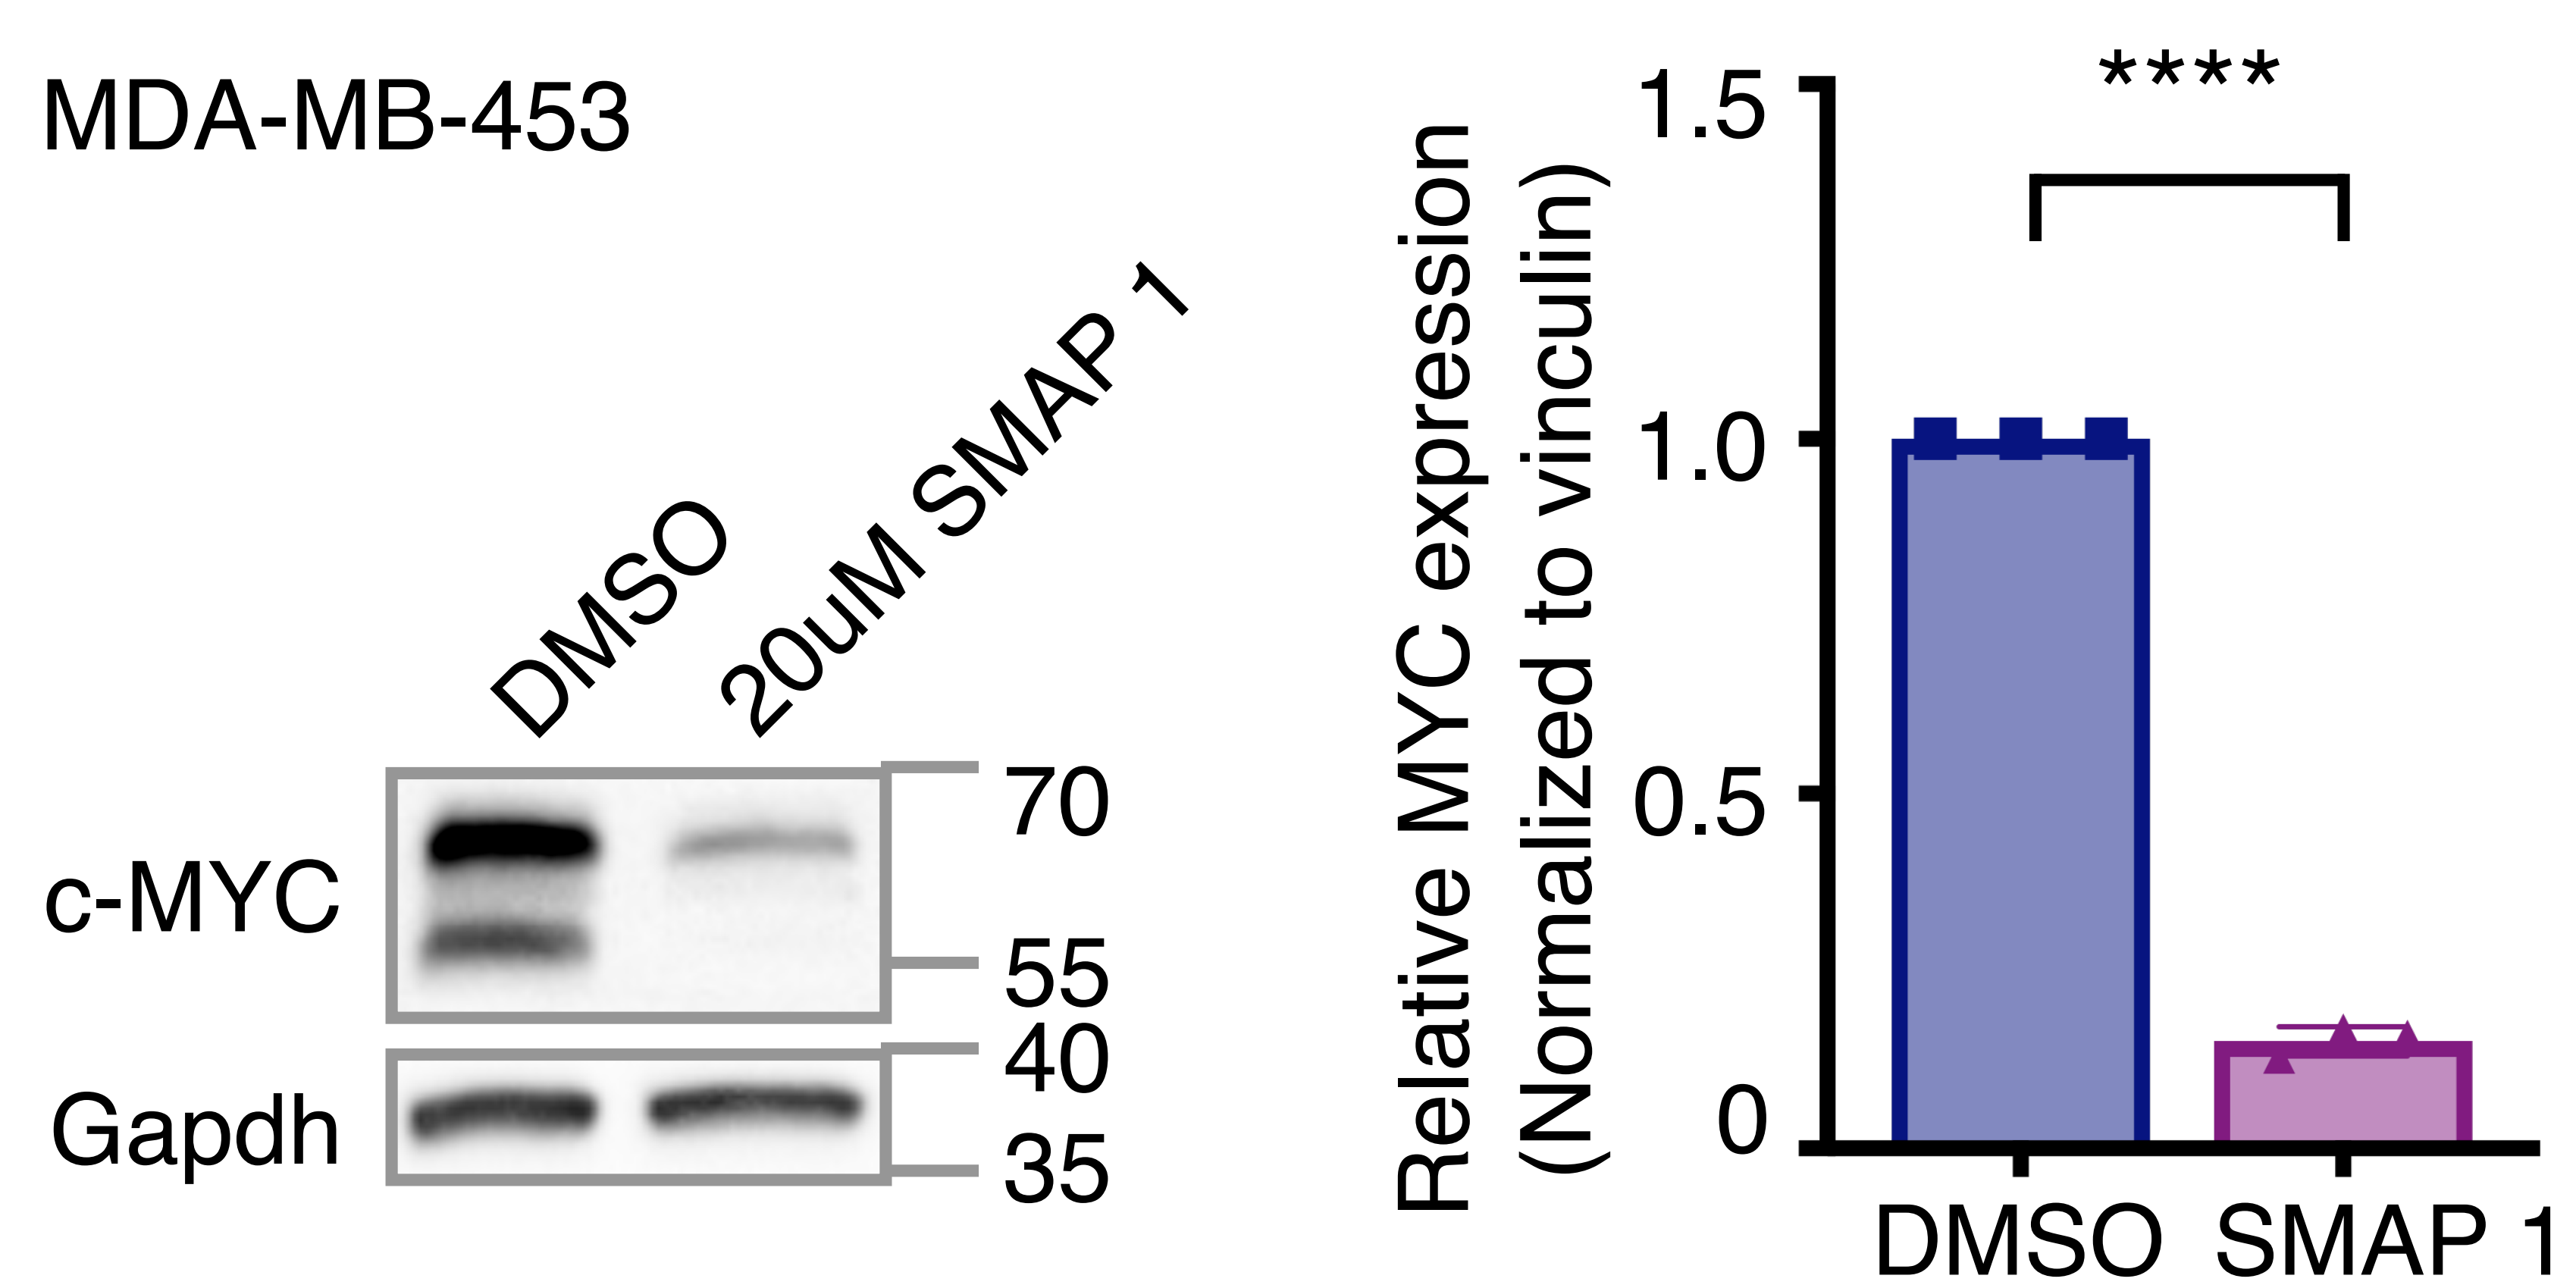

C

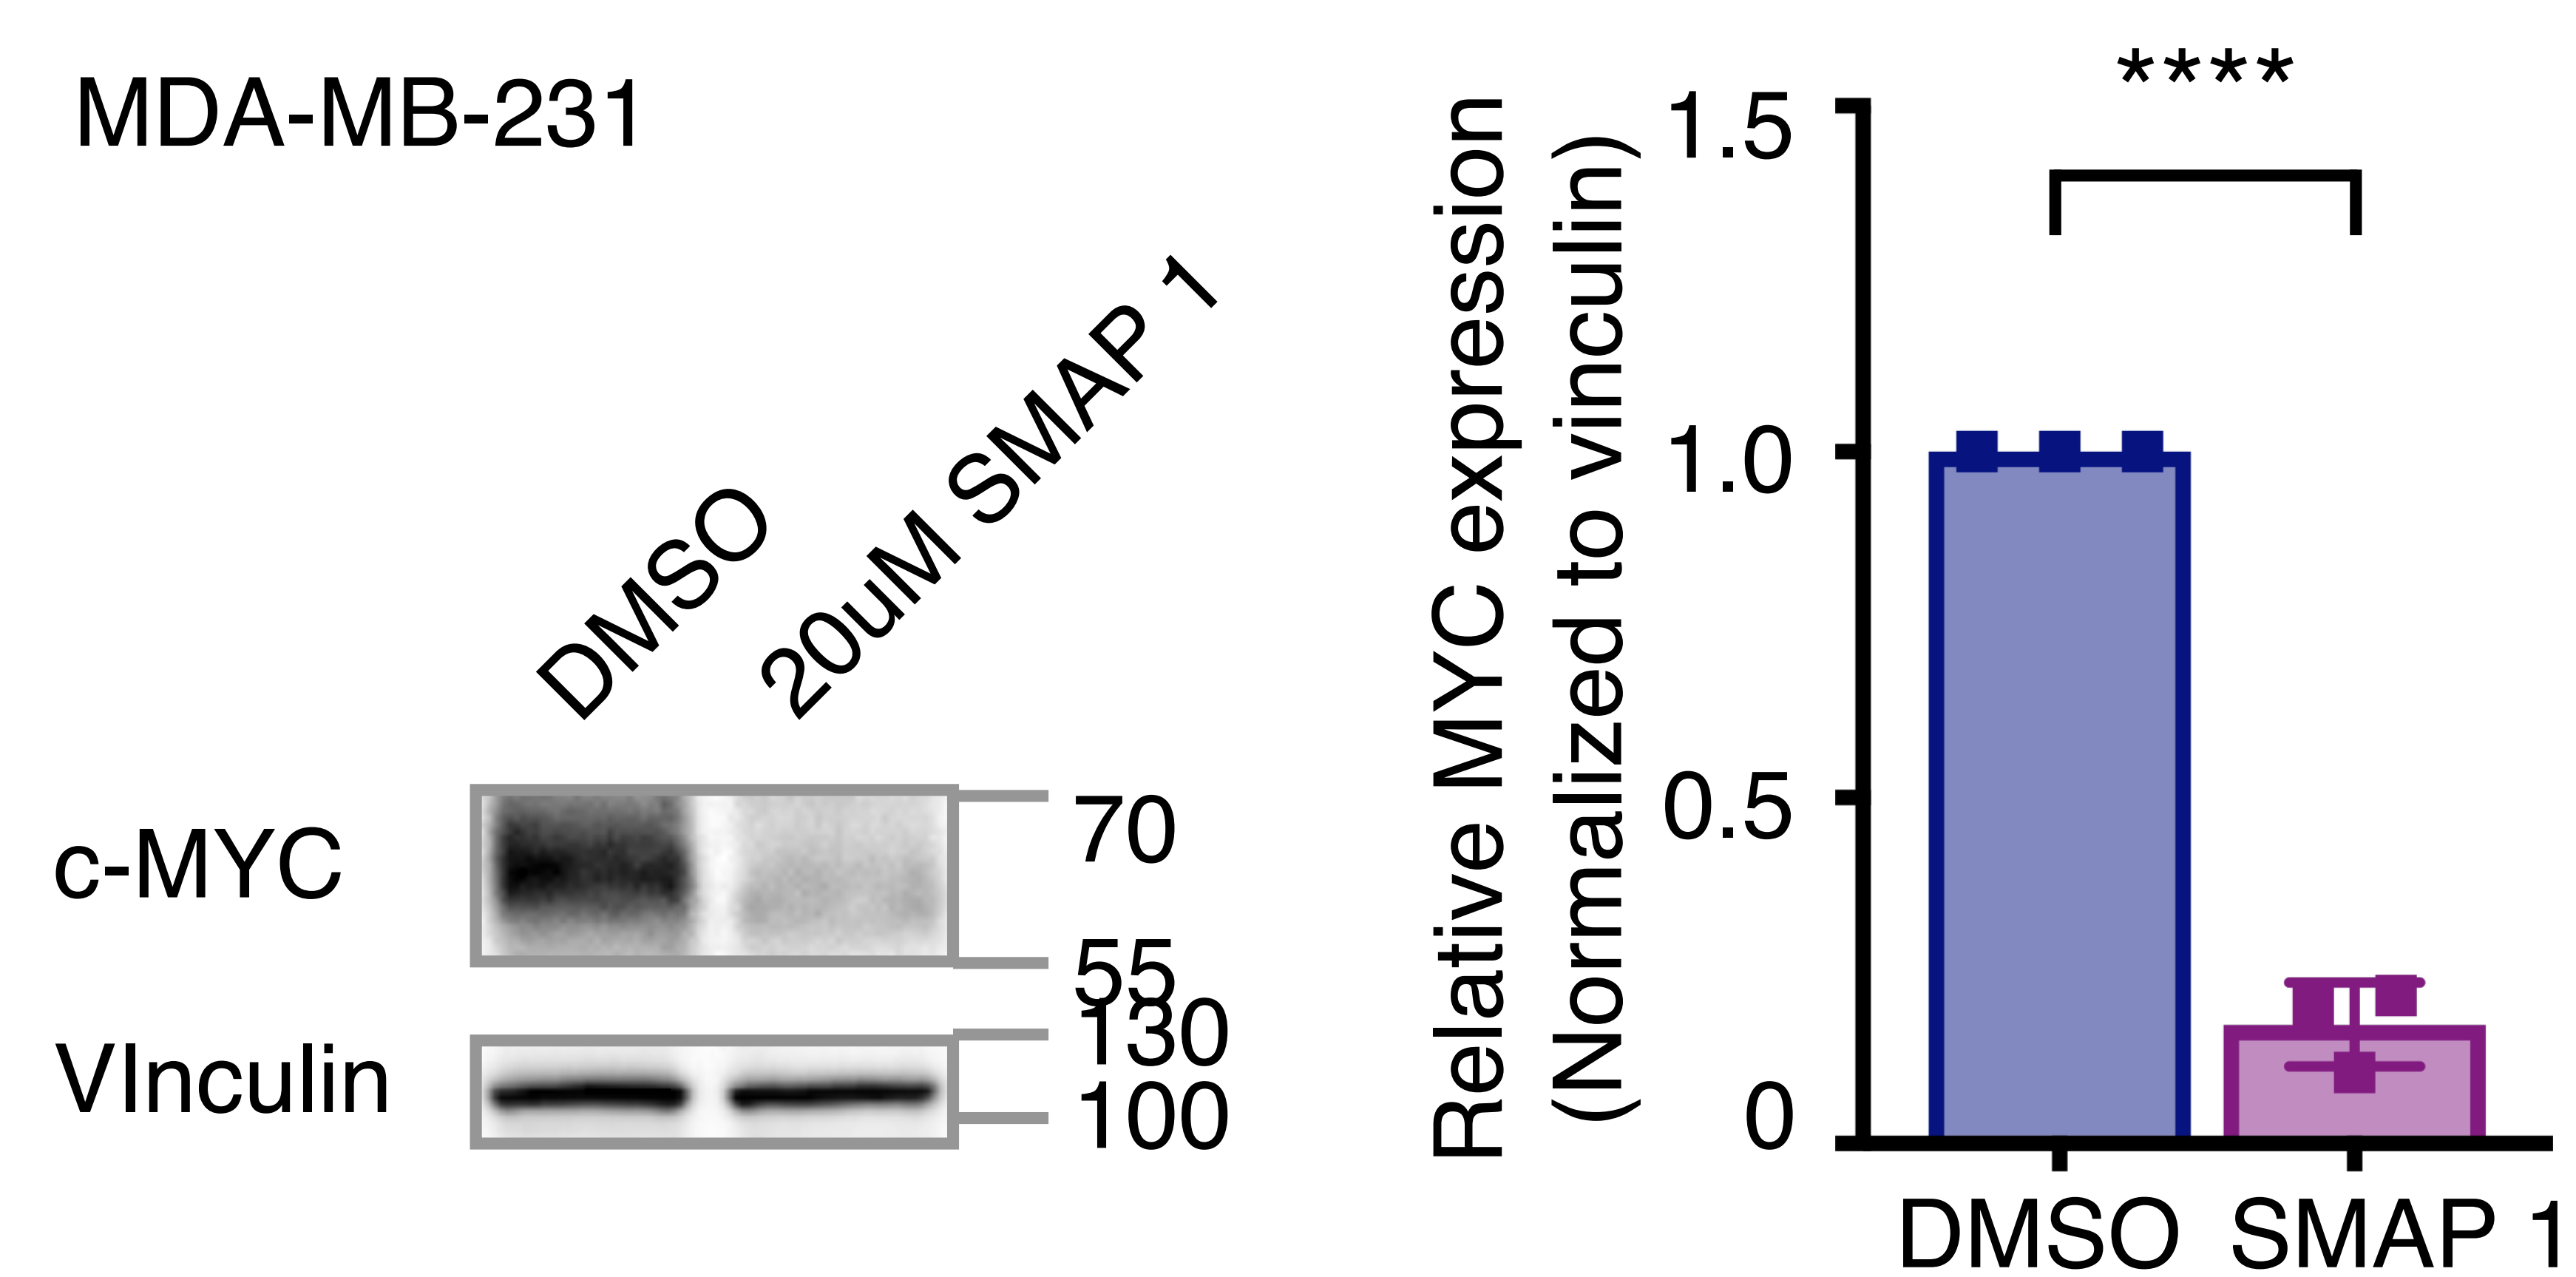

D

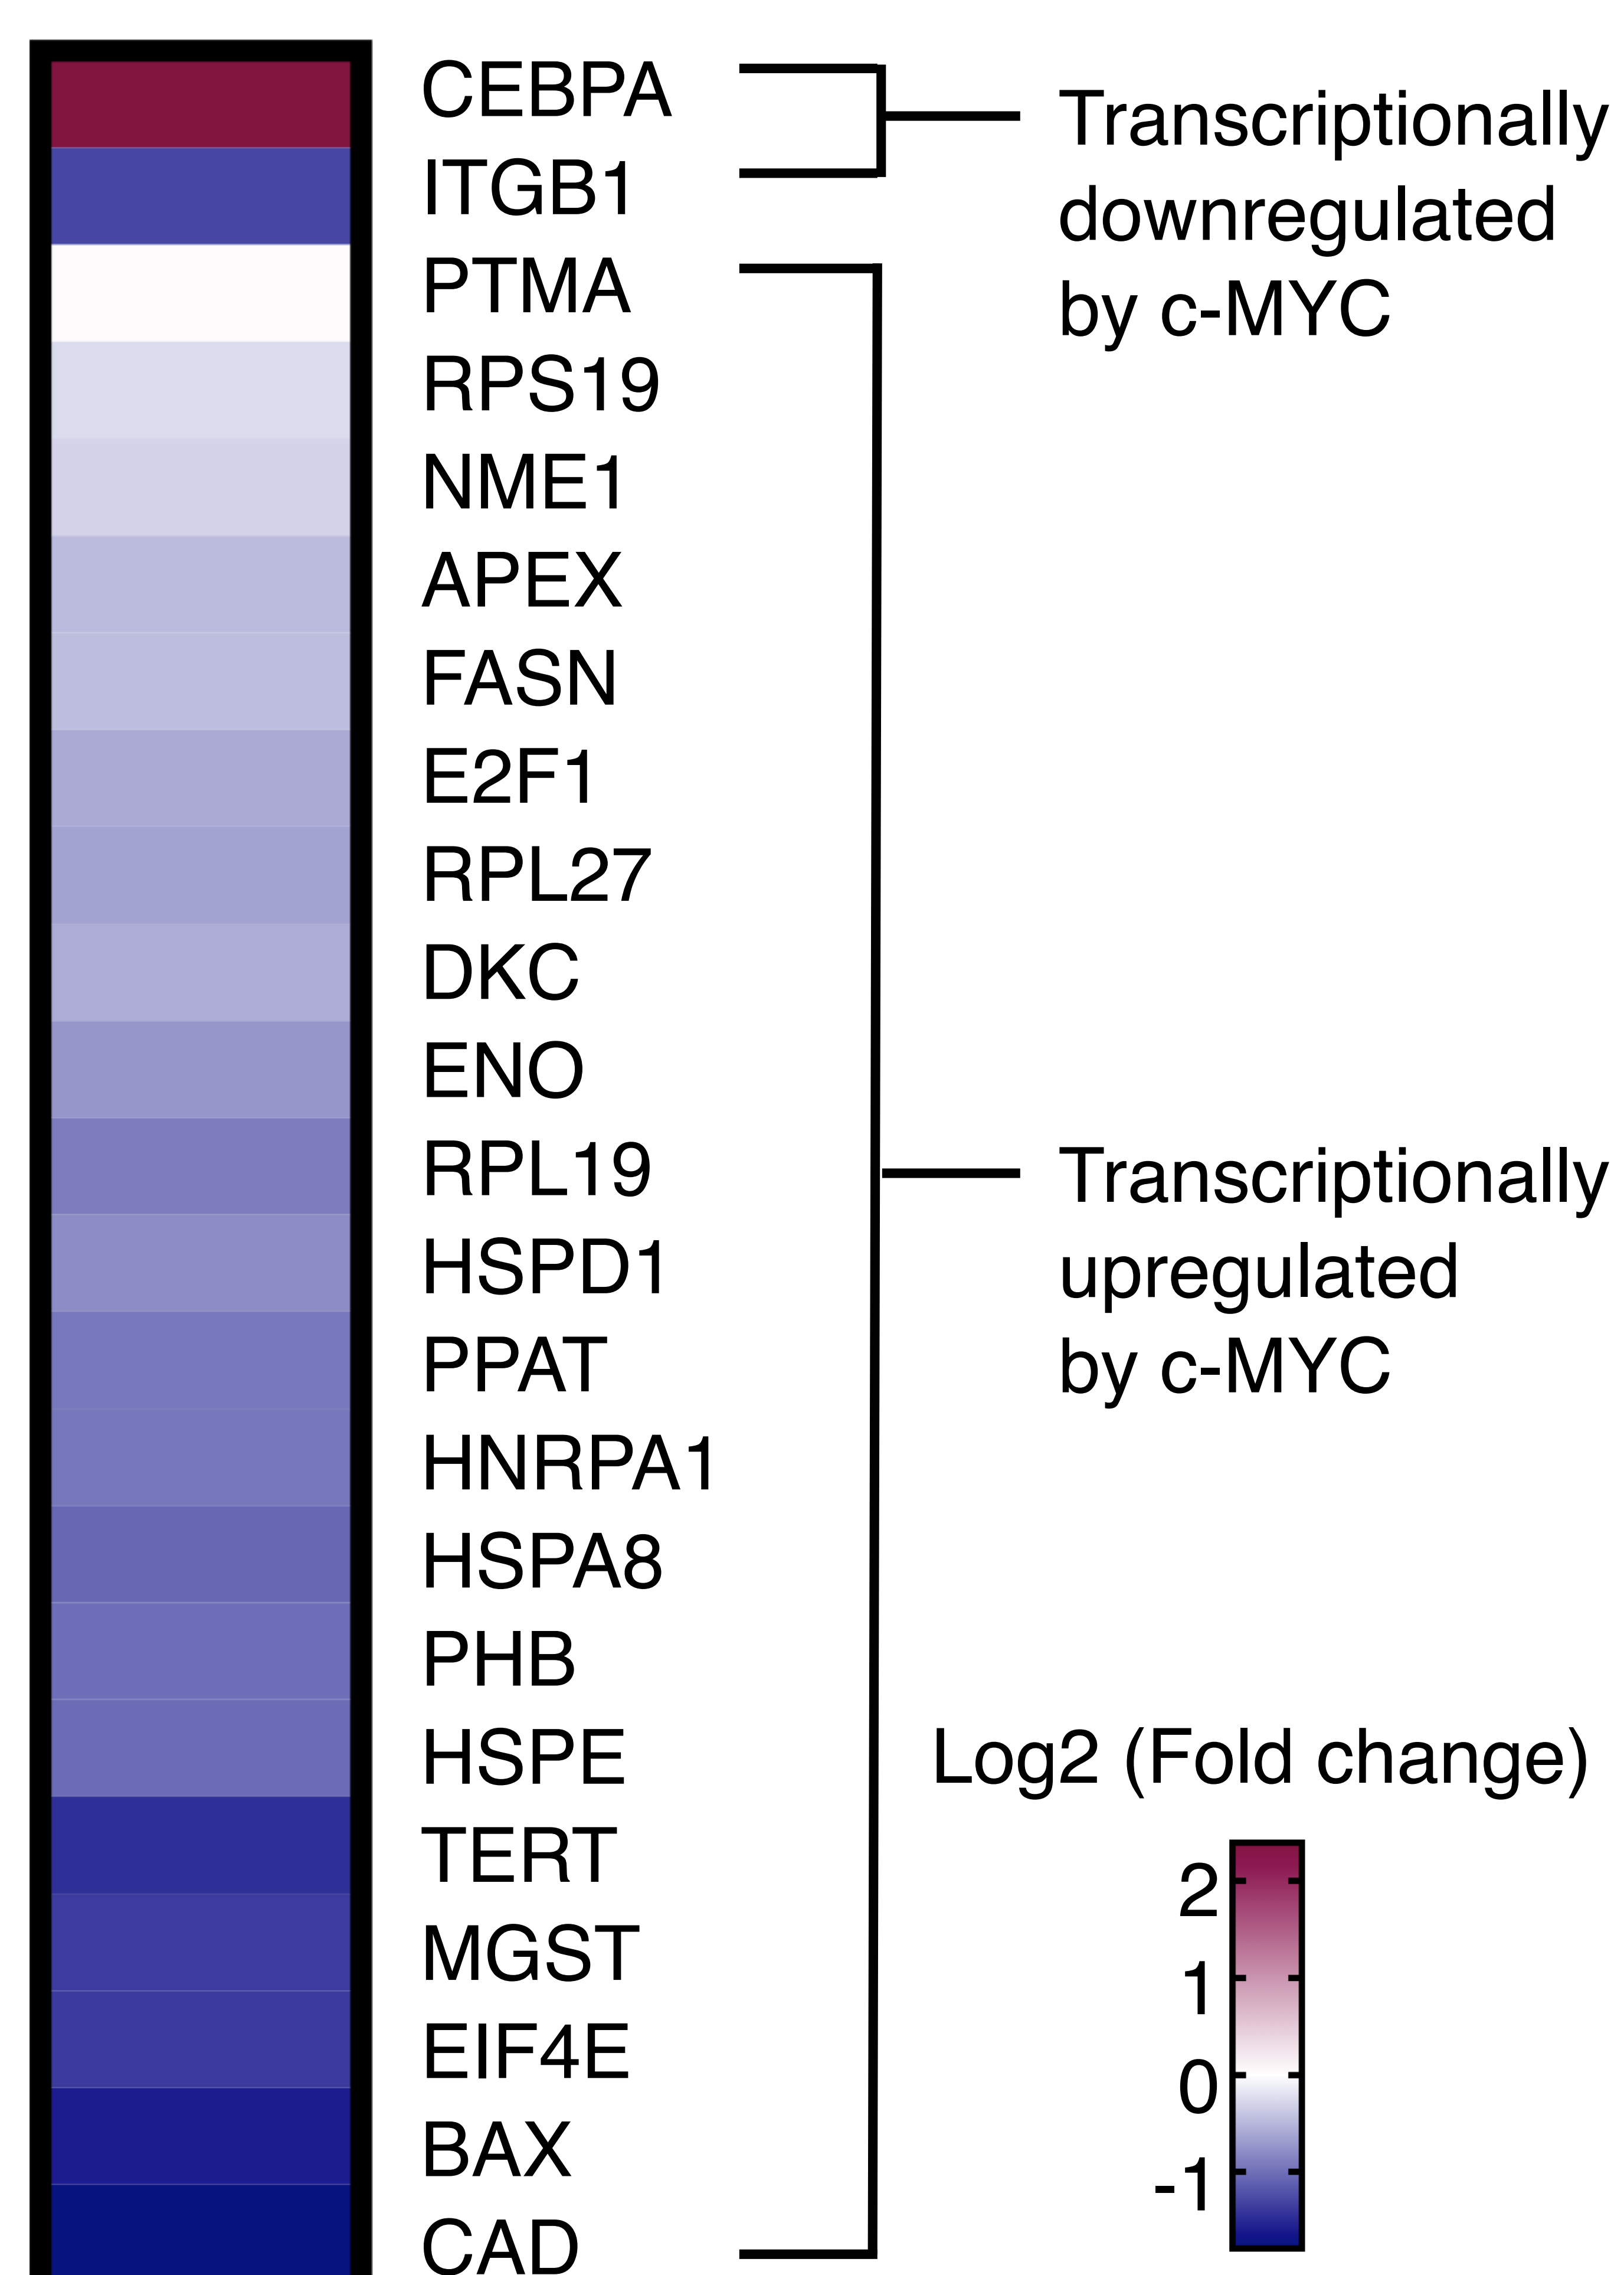

**Supplemental Figure 6. SMAPs do not induce changes to c-MYC mRNA in Burkitts or breast cancer cell lines and inhibit c-MYC protein in breast cancer cell lines** (A) mRNA expression of c-MYC in Daudi cell line upon treatment with 20uM SMAP 1 at 6 hours (B) Western blot and n=3 quantification for MYC expression in MDA-MB-453 at 3 hours with SMAP 1 treatment and (C) Western blot and n=3 quantification for MYC expression in MDA-MB-231 at 3 hours with SMAP 1 treatment. (D) Changes to mRNA expression of c-MYC target genes in MDA-MB-231 upon treatment with SMAP 1 for 6 hours

| Target Gene   | Primer Sequence          |
|---------------|--------------------------|
| ITGB1 SET F1  | CAGTCCAATCCAGAAAATTGG    |
| ITGB1 SET R1  | GAGTCGCGGAACAGCAG        |
| HSPA8 SET F1  | TGGAAAACACCCACACAAGA     |
| HSPA8 SET R1  | TCCTTCGTTATTGGAGCCAG     |
| HSPE SET F1   | TGCCCTCCATATTCTGGGAGA    |
| HSPE SET R1   | AGTAGTCGCTGTTGGATCGG     |
| HSPD1 SET F1  | TTGACTGCCACAACCTGAAG     |
| HSPD1 SET R1  | CACCGTAAGCCTTTGGTCAT     |
| PHB SET F1    | TGGTGAAGATGCGAGGAAG      |
| PHB SET R1    | ACCACGTAATGTGCCAGTCA     |
| EIF4E SET F1  | CTGGGTTAGCAACCTCCTGA     |
| EIF4E SET R1  | CTAAGATGGCGACTGTCGAA     |
| RPL19 SET F1  | GCCCATCTTTGATGAGCTTC     |
| RPL19 SET R1  | GTGGCAAGAAGAAGGTCTGG     |
| RPL27A SET F1 | GCTTTCCCTTTCCAGAACT      |
| RPL27A SET R1 | ACGGGTGAATGCTGCTAAAA     |
| RPS19 SET F1  | TCCCCATAGATCTTGGTCA      |
| RPS19 SET R1  | AACTGGTTCTACACGCGAGC     |
| FASN SET F1   | TCTCCGACTCTGGCAGCTT      |
| FASN SET R1   | GCTCCAGCCTCGCTCTC        |
| CAD SET F1    | CAAAGCCCACACAGTTCTCA     |
| CAD SET R1    | ATTGGGAGCTGCATGAAGAG     |
| PPAT SET F1   | GATTTGAATGTTGGCACCG      |
| PPAT SET R1   | TGATCACTCTGGGACTCGTG     |
| MGST1 SET F1  | GCATAGGATGCAAAAGCCAT     |
| MGST1 SET R1  | TTGTCTGGTATCATGAATTTGGA  |
| PSMB1 SET F1  | GTAGCATGGCACTTGCTGAG     |
| PSMB SET R1   | TCGGTGGACTTGATGAAGAAG    |
| DKC1 SET F1   | GCAGGTAGAGATGACCGCTG     |
| DKC1 SET R1   | ATATGAGGACGGCATTGAGG     |
| HNRPA1 SET F1 | TCAACCCTCCAATGAAGAGC     |
| HNRPA1 SET R1 | GCCGAAGAAGCATCGTTAAA     |
| NCL SET F1    | TTGCCTTTCTTCTGAGGTATGA   |
| NCL SET R1    | CCTCCTCCAAAGGAGGTAGAA    |
| CEBPA SET F1  | TTCACATTGCACAAGGCACT     |
| CEBPA SET R1  | GAGGGACCGGAGTTATGACA     |
| E2F1 SET F1   | GGCCAGGTA CTGATGGTCA     |
| E2F1 SET R1   | GACCCTGACCTGCTGCTCT      |
| ENO1 SET F1   | CCTGGCATGGATCTTGAGAA     |
| ENO1 SET R1   | TACGTTACCTCGGTGTCTG      |
| NME1 SET F1   | CGGTCCTTCAGGTCAACGTA     |
| NME1 SET R1   | GCGTTTTGAGCAGAAAGGAT     |
| APEX SET F1   | CTGGGGCTTCTTCTTTACC      |
| APEX SET R1   | TGCCCACTCAAGATCTGCT      |
| PTMA SET F1   | TTTCCTCATTAGCATTCCCG     |
| PTMA SET R1   | AGACACCAGCTCCGAAATCA     |
| TERT SET F1   | CAGGATCTCCTCACGCAGAC     |
| TERT SET R1   | GAGCTGACGTGGAAGATGAG     |
| BAX1 SET F1   | GGAGGAAGTCCAATGTCCAG     |
| BAX1 SET R1   | GGGTTGTCGCCCTTTTCTAC     |
| CDKN1B SET F1 | TTCATCAAGCAGTGATGTATCTGA |
| CDKN1B SET R1 | AAGAAGCCTGGCCTCAGAAG     |
| MYC SET F1    | CACCGAGTCGTAGTCGAGGT     |
| MYC SET R1    | TTTCGGGTAGTGAAAACCA      |

**Supplemental Table 1: c-MYC target genes used to assess c-MYC transcriptional activity and corresponding primer sequences for qRT-PCR.**

| Gene Target | Mean Log 2 (fold change) | Standard Deviation |
|-------------|--------------------------|--------------------|
| CEBPA       | 6.28                     | 0.27               |
| ITGB1       | -1.39                    | 0.61               |
| E2F1        | 0.32                     | 0.27               |
| RPS19       | -0.21                    | 0.25               |
| RPL27       | -0.83                    | 0.06               |
| APEX        | -0.80                    | 0.12               |
| NCL-2       | -0.65                    | 0.29               |
| BAX         | -0.68                    | 0.05               |
| RPL19       | -0.73                    | 0.23               |
| NME1        | -0.73                    | 0.22               |
| FASN        | -1.21                    | 0.94               |
| ENO         | -1.21                    | 0.61               |
| DKC         | -1.11                    | 0.14               |
| HSPA8       | -1.17                    | 0.47               |
| PPAT        | -1.15                    | 0.15               |
| PSMB        | -1.18                    | 0.33               |
| PTMA        | -1.30                    | 0.34               |
| HSPD1       | -1.29                    | 0.18               |
| TERT        | -1.39                    | 0.42               |
| HNRPA1      | -1.44                    | 0.49               |
| PHB         | -1.57                    | 0.59               |
| EIF4E       | -1.68                    | 0.54               |
| HSPE        | -1.91                    | 0.24               |
| CAD         | -2.46                    | 0.28               |

**Supplemental Table 2. Changes to c-MYC target genes in the Daudi cell line.** Mean (n=4) Log<sub>2</sub>(fold change) of c-MYC target genes after 6 hours of SMAP 1 exposure normalized to DMSO treated cells.



| Gene Target | Mean Log 2 (fold change) | Standard Deviation |
|-------------|--------------------------|--------------------|
| CEBPA       | 0.72                     | 0.15               |
| ITGB1       | -0.39                    | 0.26               |
| PTMA        | 0.01                     | 0.10               |
| RPS19       | -0.08                    | 0.16               |
| NME1        | -0.09                    | 0.12               |
| APEX        | -0.15                    | 0.10               |
| FASN        | -0.14                    | 0.04               |
| E2F1        | -0.18                    | 0.13               |
| RPL27       | -0.20                    | 0.17               |
| DKC         | -0.18                    | 0.05               |
| ENO         | -0.22                    | 0.18               |
| RPL19       | -0.28                    | 0.30               |
| HSPD1       | -0.24                    | 0.10               |
| PPAT        | -0.29                    | 0.05               |
| HNRPA1      | -0.29                    | 0.00               |
| HSPA8       | -0.32                    | 0.20               |
| PHB         | -0.31                    | 0.04               |
| HSPE        | -0.31                    | 0.03               |
| TERT        | -0.44                    | 0.26               |
| MGST        | -0.41                    | 0.16               |
| EIF4E       | -0.42                    | 0.02               |
| BAX         | -0.48                    | 0.25               |
| CAD         | -0.54                    | 0.26               |

**Supplemental Table 3. Changes to c-MYC target genes in the MDA-MB-231 cell line.** Mean (n=3) Log<sub>2</sub>(fold change) of c-MYC target genes after 6 hours of SMAP 1 exposure normalized to DMSO treated cells.

A

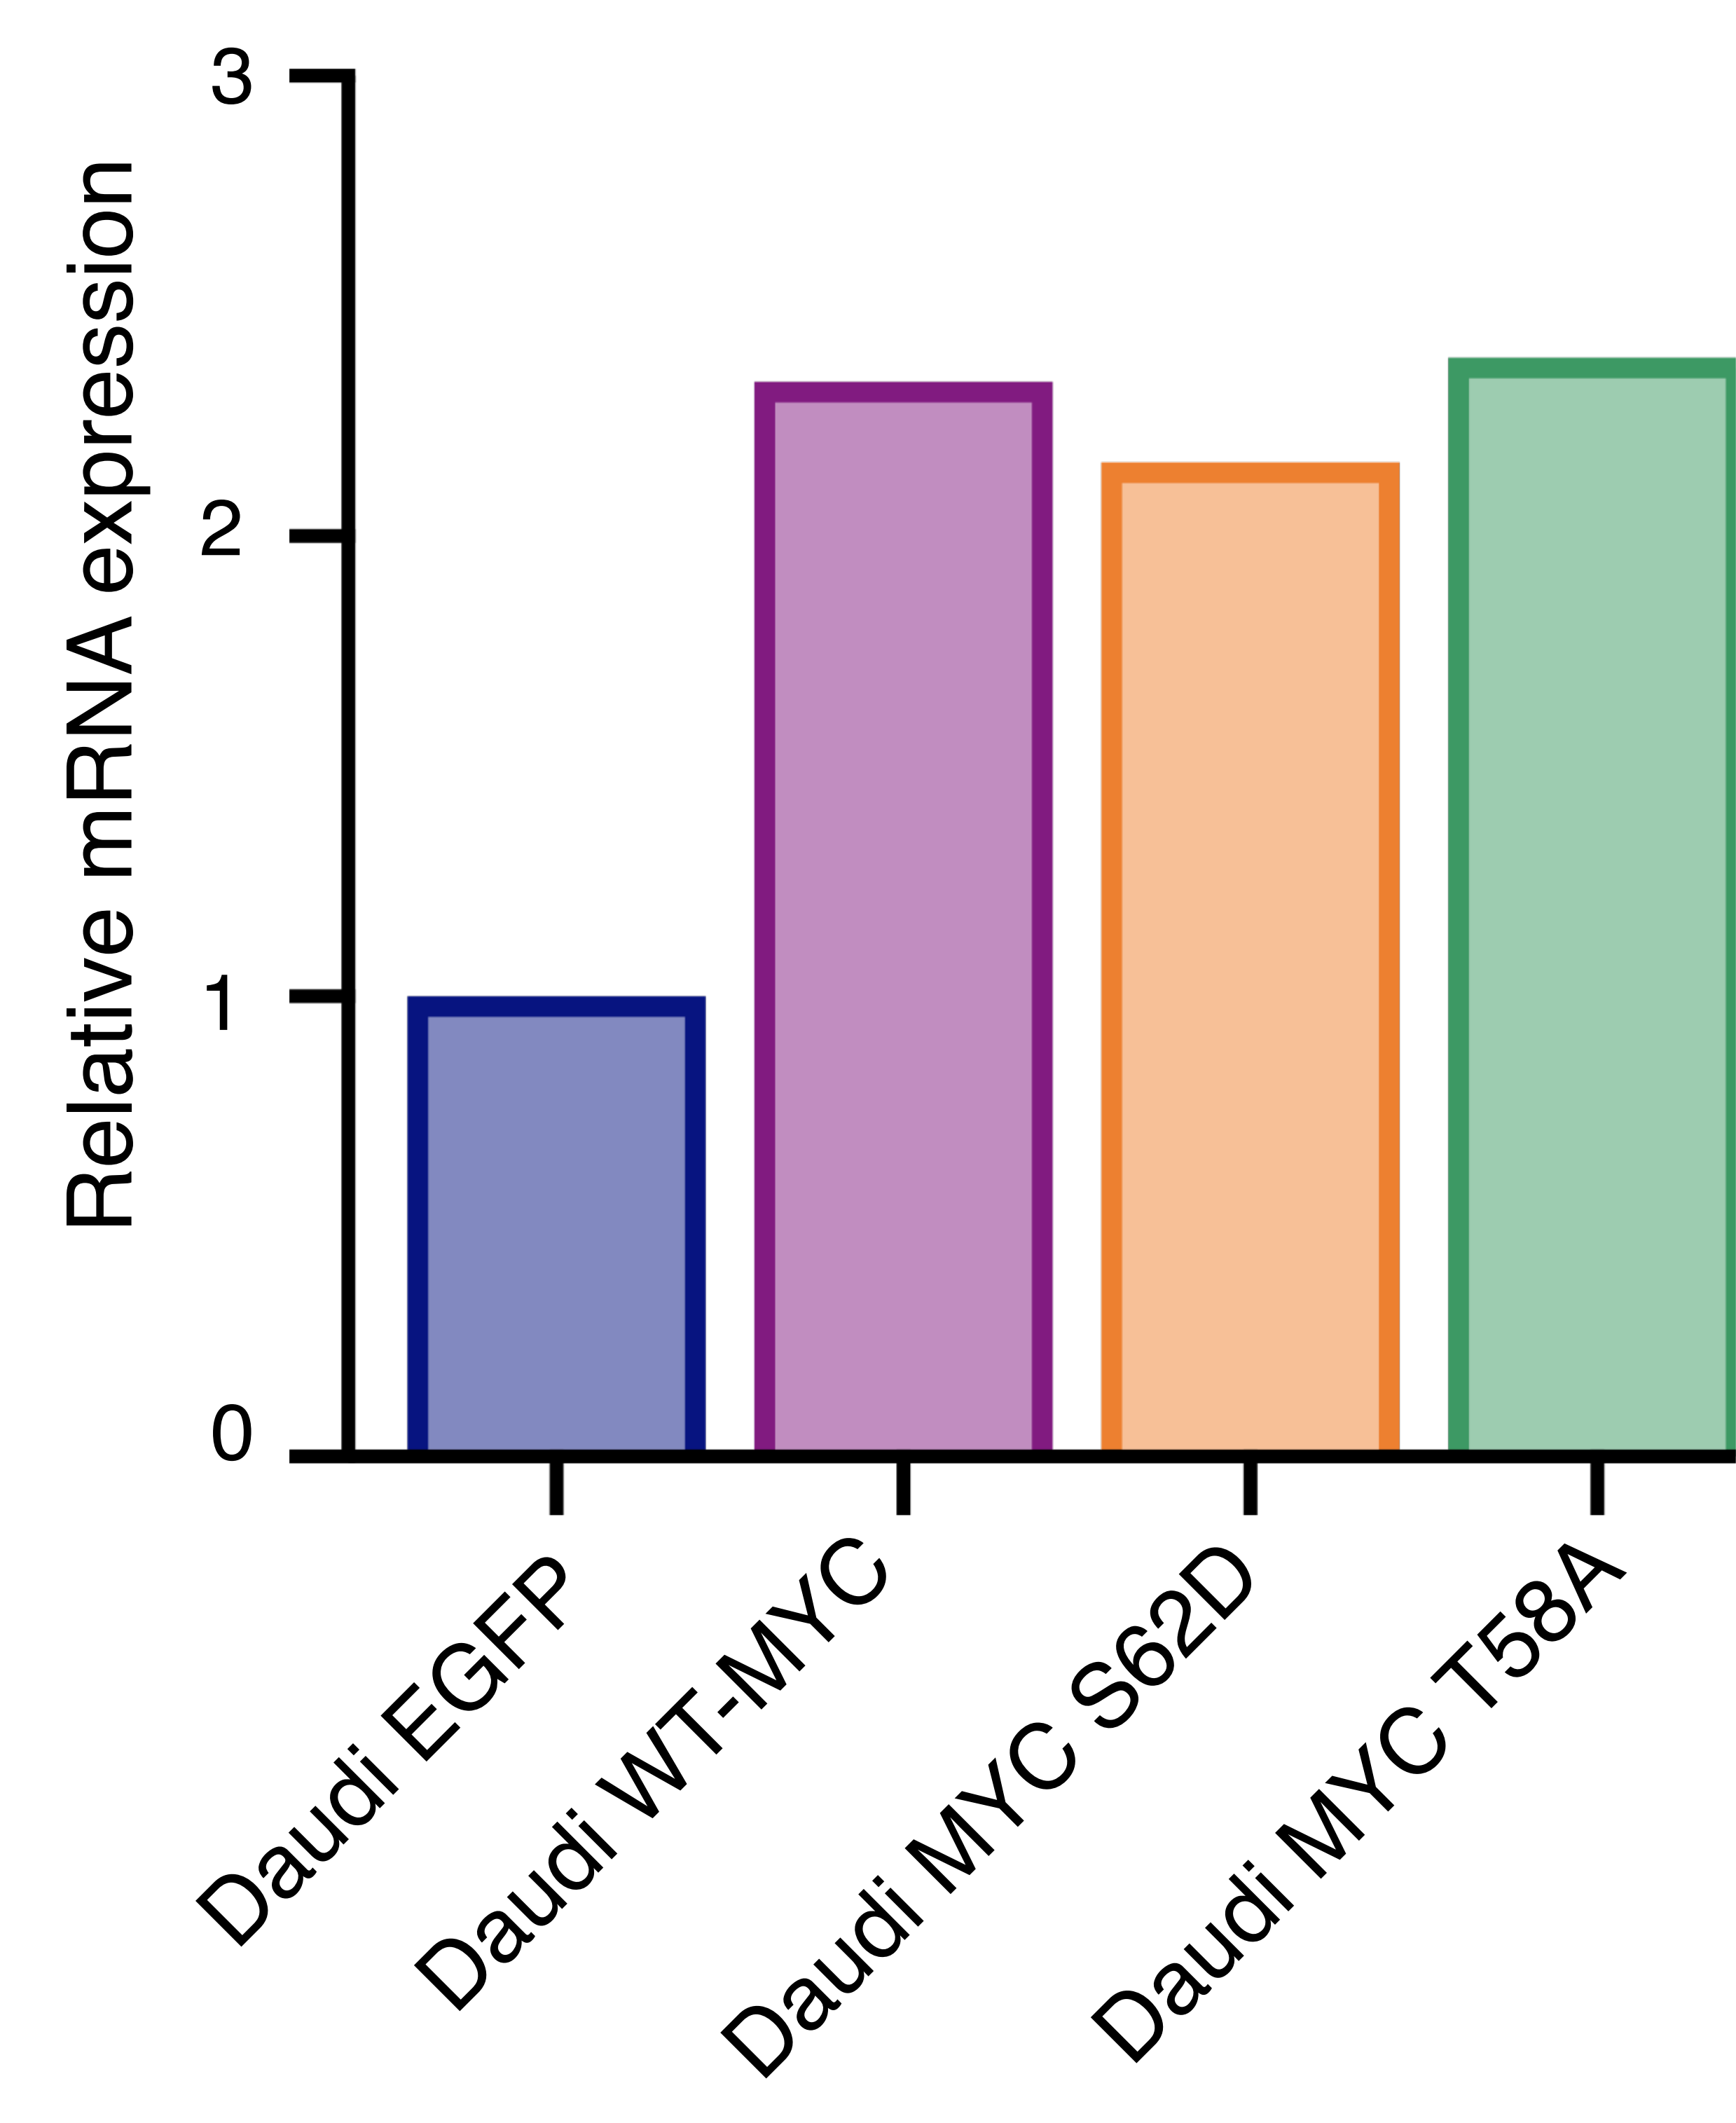

B

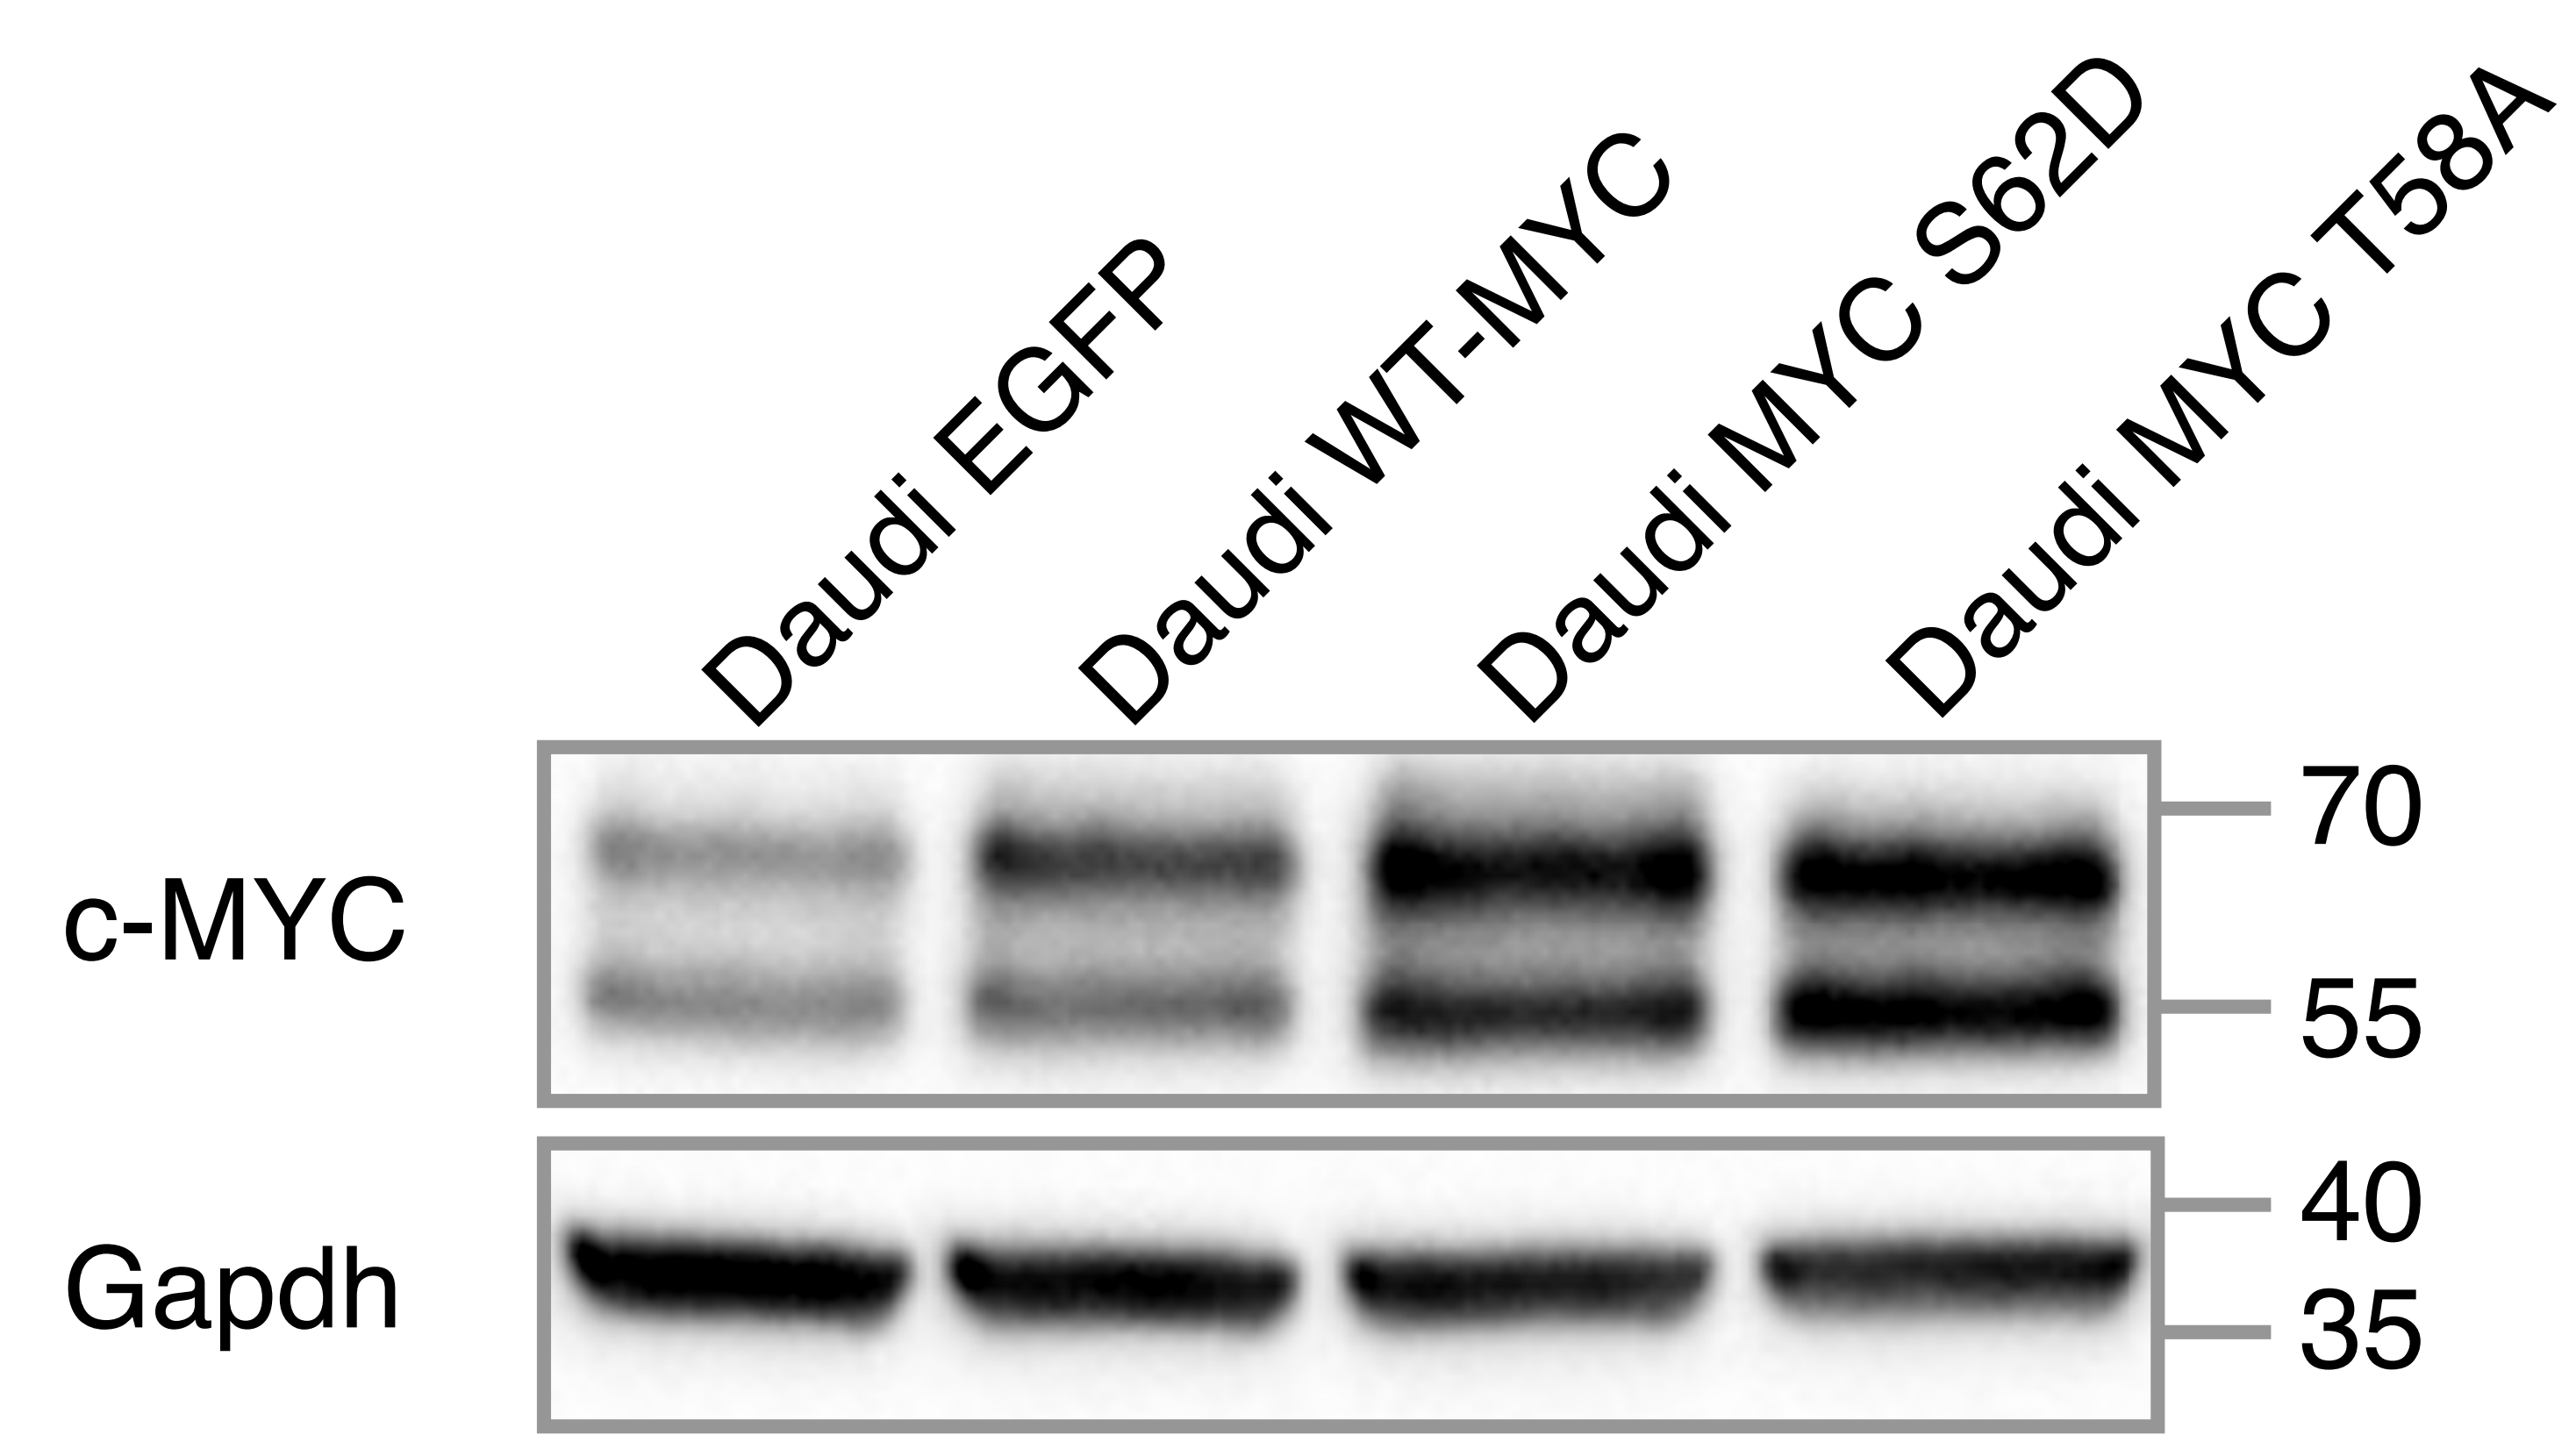

**Supplemental Figure 7. (A)** Confirmation of MYC overexpression in Daudi cell line. **(B)** mRNA expression for MYC in EGFP, WT-MYC, MYC S62D and T58A overexpressing cell lines and corresponding expression of c-MYC protein.

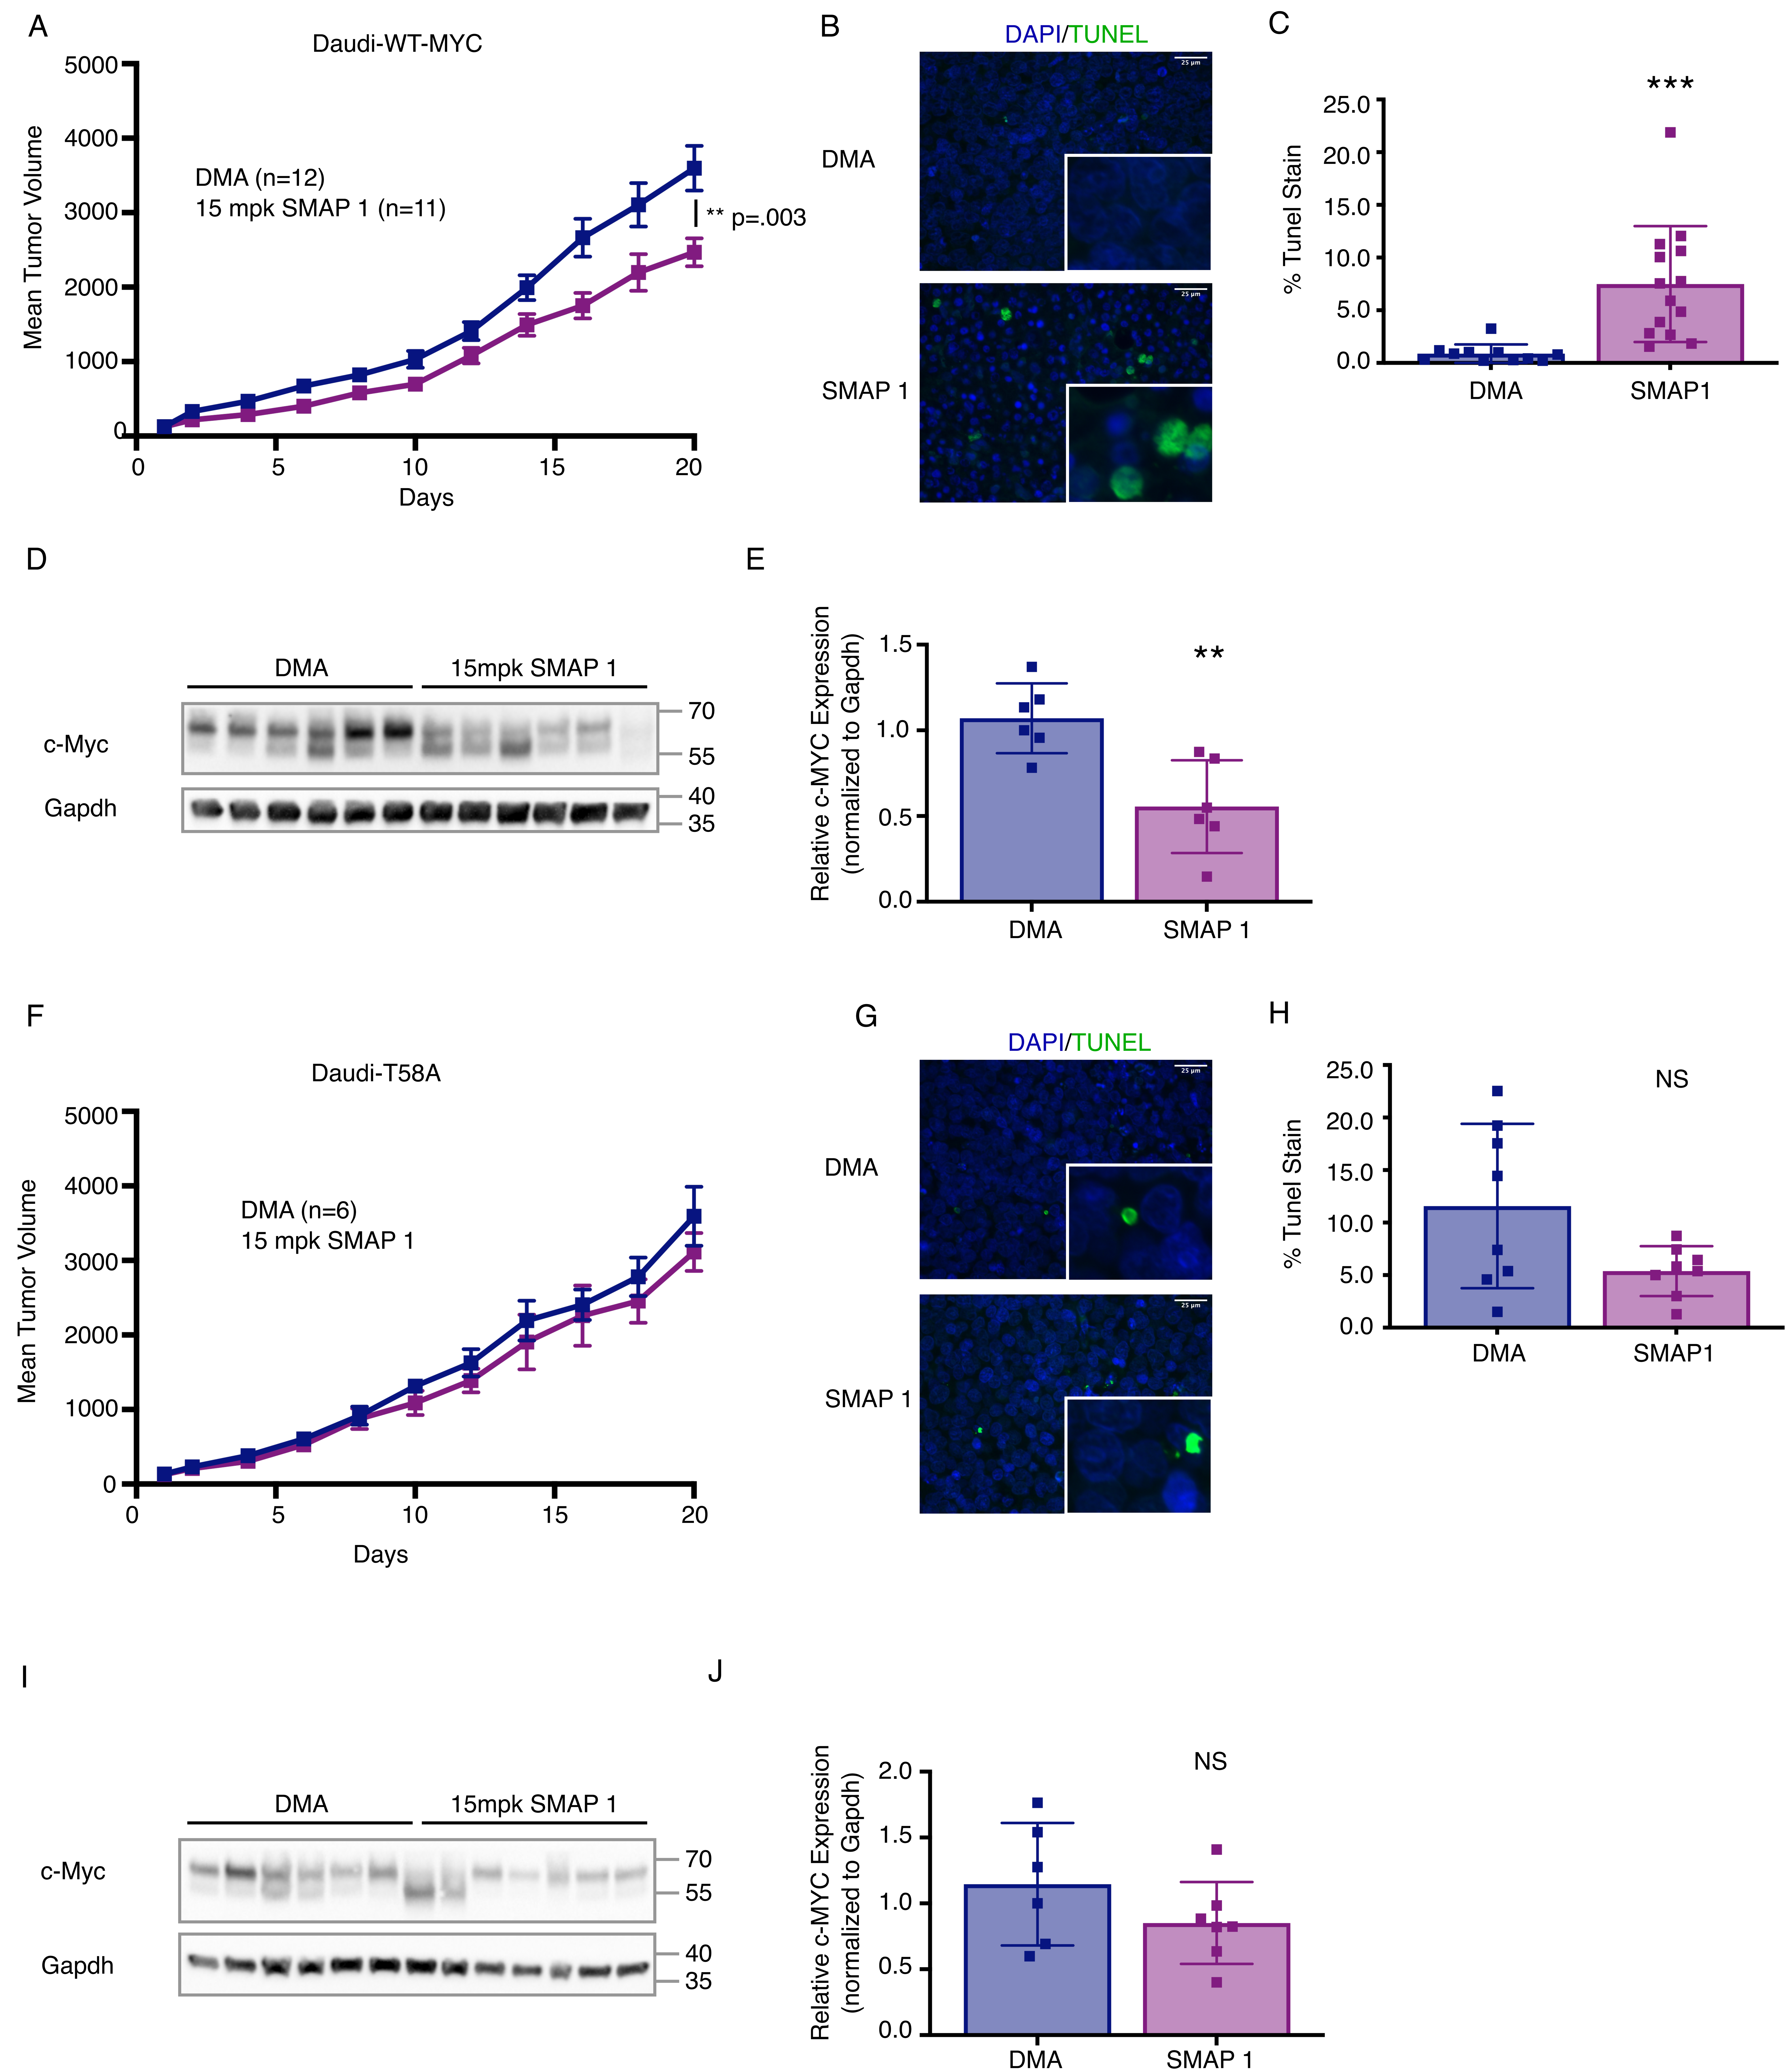

**Supplemental Figure 8. SMAP inhibition of tumor growth and changes to c-MYC expression is abrogated by mutation to c-MYC phosphodegrom** (A) Tumor growth in a xenograft model of Daudi cell line expressing WT c-MYC treated with DMA or SMAP 1 BID (B) Representative images of TUNEL staining of WT c-MYC tumors treated with DMA or SMAP 1 (C) quantification of TUNEL in WT c-MYC tumors. (D) Western blotting for c-MYC in DMA and SMAP 1 treated WT c-MYC tumors (E) quantification of c-MYC protein in DMA and SMAP treated WT c-MYC tumors normalized to GAPDH (F) Tumor growth in a xenograft model of Daudi cell line expressing c-MYC with a T58A mutation treated with DMA or SMAP 1 BID (G) Representative images of TUNEL staining of MYC T58A tumors treated with DMA or SMAP 1 (H) quantification of TUNEL in MYC T58 tumors. (I) Western blotting for c-MYC in DMA and SMAP 1 treated MYC T58A tumors (J) quantification of c-MYC protein in DMA and SMAP treated MYC T58A tumors normalized to GAPDH

A

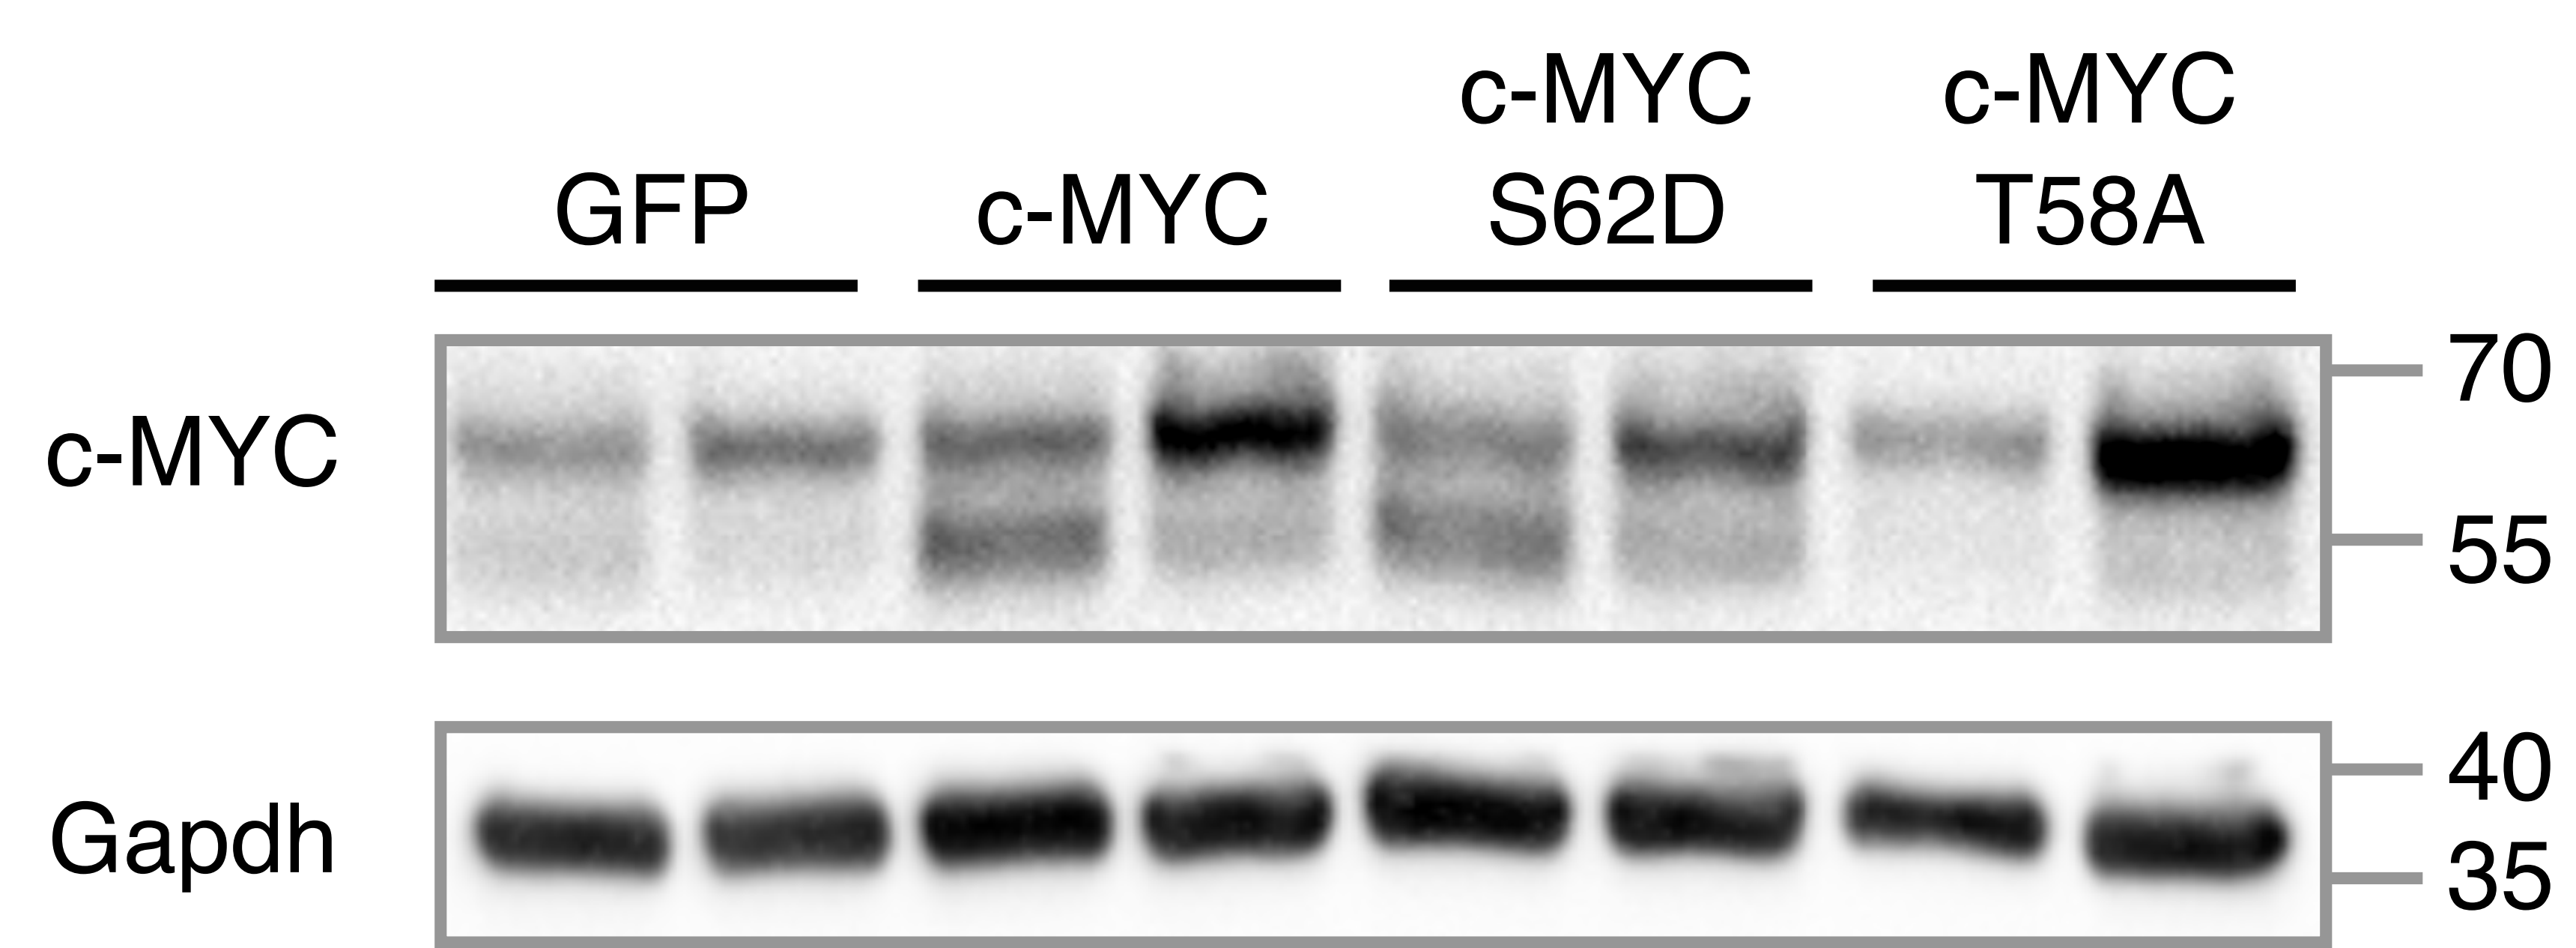

B

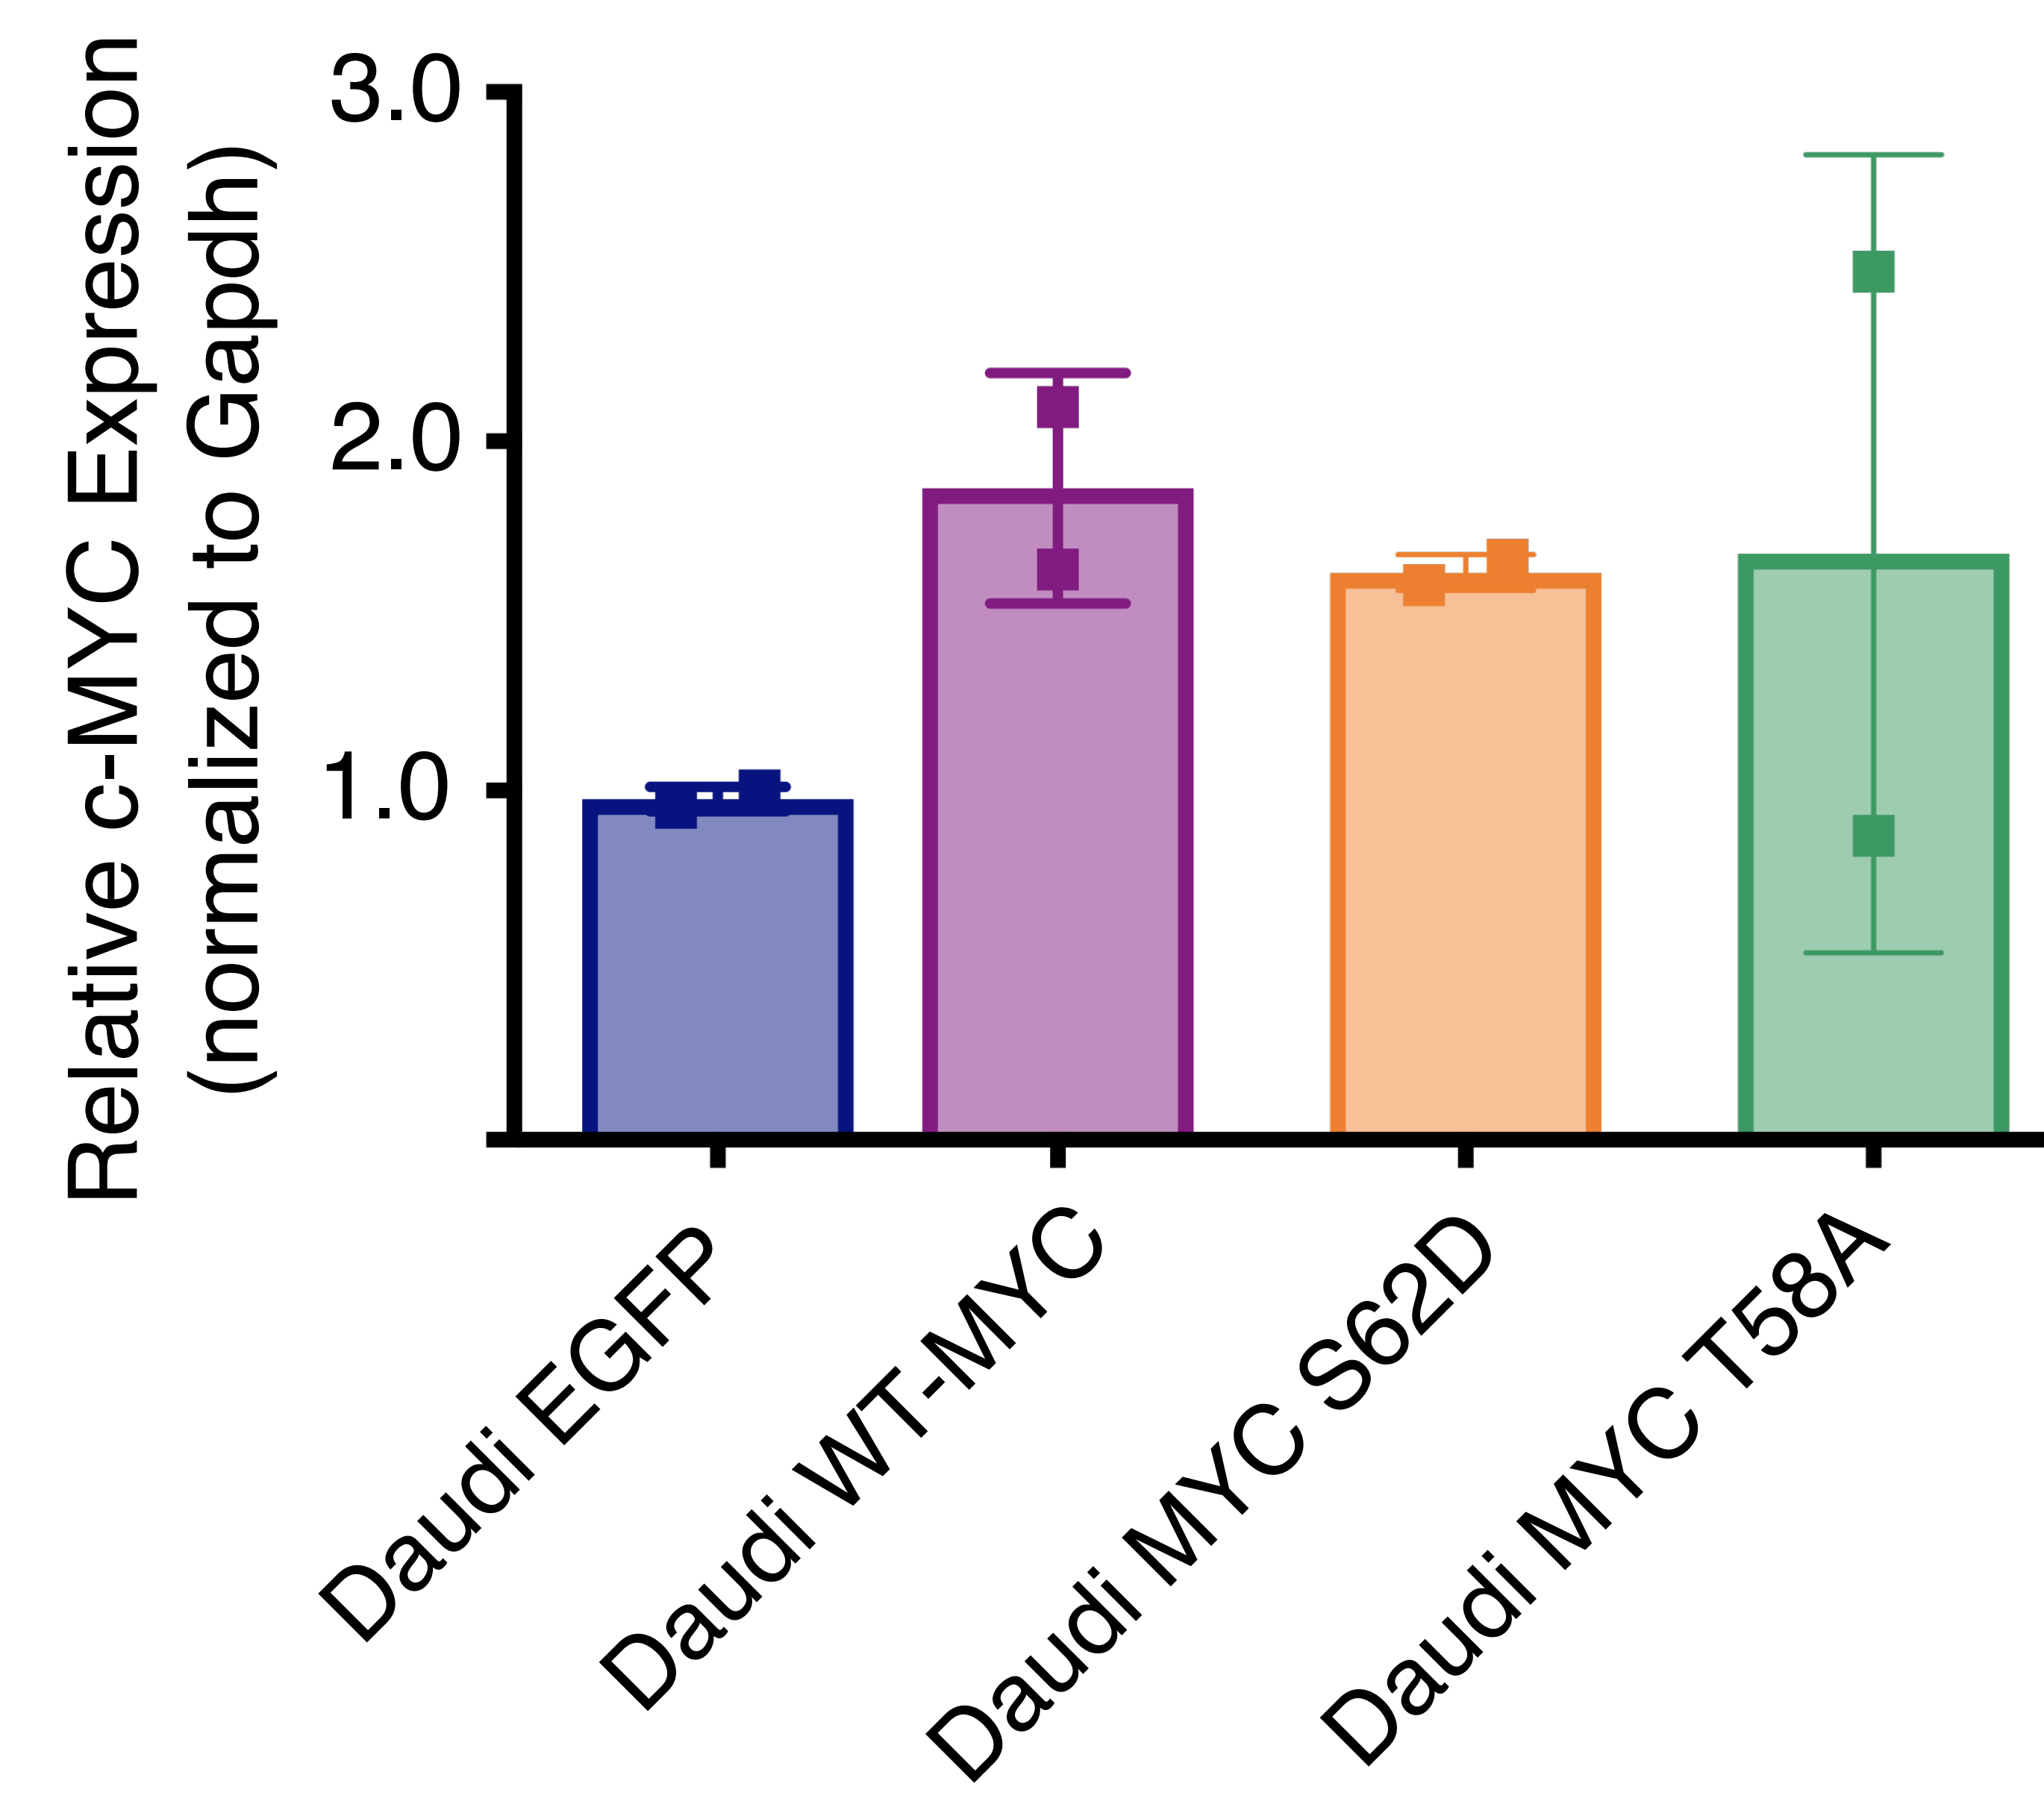

**Supplemental Figure 9. Confirmation of c-MYC band and overexpression in Daudi tumor lysates.** (A) Lysates from two different tumors in each Daudi xenograft presented in figure 5A-J and supplemental figure 8A-J, Daudi GFP, Daudi c-MYC, Daudi c-MYC s62d, Daudi c-MYC t58A for c-MYC. (B) quantification of MYC expression in A.
